# Supplementary material for: Barriers to Accessing Kidney Transplantation Among Populations Marginalized by Race and Ethnicity in Canada: A Scoping Review Part 1—Indigenous Communities in Canada
Source: PubMed Central journal article supplement — Can J Kidney Health Dis. 2021 Mar 3;8:2054358121996835. doi: 10.1177/2054358121996835 (PMC7934025; doi:10.1177/2054358121996835), 2021-03-03
Supplement: sj-pdf-1-cjk-10.1177_2054358121996835.pdf [file sj-pdf-1-cjk-10.1177_2054358121996835.pdf]

## Supplement: Database Search Strategies

Ovid MEDLINE(R) ALL <1946 to June 19, 2020>

Search history sorted by search number ascending

| #  | Searches                            | Results | Type     |
|----|-------------------------------------|---------|----------|
| 1  | Organ Transplantation/              | 12899   | Advanced |
| 2  | exp Heart Transplantation/          | 35370   | Advanced |
| 3  | Kidney Transplantation/             | 95022   | Advanced |
| 4  | Liver Transplantation/              | 56151   | Advanced |
| 5  | exp Lung Transplantation/           | 16047   | Advanced |
| 6  | Pancreas Transplantation/           | 7423    | Advanced |
| 7  | Transplant Recipients/              | 3679    | Advanced |
| 8  | Transplantation/                    | 8920    | Advanced |
| 9  | Tissue donors/                      | 38432   | Advanced |
| 10 | Living donors/                      | 15186   | Advanced |
| 11 | exp "Tissue and Organ Procurement"/ | 20702   | Advanced |
| 12 | (living adj3 donor*).mp.            | 22212   | Advanced |
| 13 | (living adj3 donation*).mp.         | 2171    | Advanced |
| 14 | (organ? adj2 transplant*).mp.       | 36564   | Advanced |
| 15 | (organ? adj2 donor*).mp.            | 10003   | Advanced |
| 16 | (organ? adj2 recipient*).mp.        | 6004    | Advanced |
| 17 | (organ? adj2 graft*).mp.            | 961     | Advanced |
| 18 | (organ? adj2 allograft*).mp.        | 919     | Advanced |
| 19 | (organ? adj2 allotransplant*).mp.   | 72      | Advanced |
| 20 | (organ? adj2 heterograft*).mp.      | 1       | Advanced |
| 21 | (organ? adj2 heterotransplant*).mp. | 1       | Advanced |
| 22 | (organ? adj2 homotransplant*).mp.   | 8       | Advanced |
| 23 | (organ? adj2 homograft*).mp.        | 9       | Advanced |
| 24 | (heart? adj2 transplant*).mp.       | 43309   | Advanced |
| 25 | (heart? adj2 donor*).mp.            | 4351    | Advanced |
| 26 | (heart? adj2 recipient*).mp.        | 5411    | Advanced |
| 27 | (heart? adj2 graft*).mp.            | 1222    | Advanced |
| 28 | (heart? adj2 allograft*).mp.        | 1564    | Advanced |
| 29 | (heart? adj2 allotransplant*).mp.   | 72      | Advanced |
| 30 | (heart? adj2 heterograft*).mp.      | 17      | Advanced |
| 31 | (heart? adj2 heterotransplant*).mp. | 2       | Advanced |
| 32 | (heart? adj2 homotransplant*).mp.   | 26      | Advanced |
| 33 | (heart? adj2 homograft*).mp.        | 58      | Advanced |
| 34 | (cardiac adj2 transplant*).mp.      | 11231   | Advanced |
| 35 | (cardiac adj2 graft*).mp.           | 1065    | Advanced |
| 36 | (cardiac adj2 allograft*).mp.       | 5171    | Advanced |

|    |                                              |       |          |
|----|----------------------------------------------|-------|----------|
| 37 | (cardiac adj2 allotransplant*).mp.           | 89    | Advanced |
| 38 | (cardiac adj2 heterograft*).mp.              | 11    | Advanced |
| 39 | (cardiac adj2 heterotransplant*).mp.         | 2     | Advanced |
| 40 | (cardiac adj2 homotransplant*).mp.           | 13    | Advanced |
| 41 | (cardiac adj2 homograft*).mp.                | 52    | Advanced |
| 42 | (cardiothoracic adj2 transplant*).mp.        | 130   | Advanced |
| 43 | (cardiothoracic adj2 graft*).mp.             | 3     | Advanced |
| 44 | (cardiothoracic adj2 allograft*).mp.         | 0     | Advanced |
| 45 | (cardiothoracic adj2 allotransplant*).mp.    | 0     | Advanced |
| 46 | (cardiothoracic adj2 heterograft*).mp.       | 0     | Advanced |
| 47 | (cardiothoracic adj2 heterotransplant*).mp.  | 0     | Advanced |
| 48 | (cardiothoracic adj2 homotransplant*).mp.    | 0     | Advanced |
| 49 | (cardiothoracic adj2 homograft*).mp.         | 0     | Advanced |
| 50 | (cardiopulmonary adj2 transplant*).mp.       | 214   | Advanced |
| 51 | (cardiopulmonary adj2 graft*).mp.            | 475   | Advanced |
| 52 | (cardiopulmonary adj2 allograft*).mp.        | 3     | Advanced |
| 53 | (cardiopulmonary adj2 allotransplant*).mp.   | 3     | Advanced |
| 54 | (cardiopulmonary adj2 heterograft*).mp.      | 0     | Advanced |
| 55 | (cardiopulmonary adj2 heterotransplant*).mp. | 0     | Advanced |
| 56 | (cardiopulmonary adj2 homotransplant*).mp.   | 2     | Advanced |
| 57 | (cardiopulmonary adj2 homograft*).mp.        | 2     | Advanced |
| 58 | (liver? adj2 transplant*).mp.                | 74853 | Advanced |
| 59 | (liver? adj2 donor*).mp.                     | 9691  | Advanced |
| 60 | (liver? adj2 recipient*).mp.                 | 8851  | Advanced |
| 61 | (liver? adj2 graft*).mp.                     | 5416  | Advanced |
| 62 | (liver? adj2 allograft*).mp.                 | 2547  | Advanced |
| 63 | (liver? adj2 allotransplant*).mp.            | 85    | Advanced |
| 64 | (liver? adj2 heterograft*).mp.               | 2     | Advanced |
| 65 | (liver? adj2 heterotransplant*).mp.          | 3     | Advanced |
| 66 | (liver? adj2 homotransplant*).mp.            | 38    | Advanced |
| 67 | (liver? adj2 homograft*).mp.                 | 39    | Advanced |
| 68 | (hepat* adj2 transplant*).mp.                | 7308  | Advanced |
| 69 | (hepat* adj2 graft*).mp.                     | 852   | Advanced |
| 70 | (hepat* adj2 allograft*).mp.                 | 587   | Advanced |
| 71 | (hepat* adj2 allotransplant*).mp.            | 24    | Advanced |
| 72 | (hepat* adj2 heterograft*).mp.               | 0     | Advanced |
| 73 | (hepat* adj2 heterotransplant*).mp.          | 5     | Advanced |
| 74 | (hepat* adj2 homotransplant*).mp.            | 9     | Advanced |
| 75 | (hepat* adj2 homograft*).mp.                 | 11    | Advanced |
| 76 | (pancrea* adj2 transplant*).mp.              | 10046 | Advanced |

|     |                                        |        |          |
|-----|----------------------------------------|--------|----------|
| 77  | (pancrea* adj2 donor*).mp.             | 704    | Advanced |
| 78  | (pancrea* adj2 recipient*).mp.         | 855    | Advanced |
| 79  | (pancrea* adj2 graft*).mp.             | 1732   | Advanced |
| 80  | (pancrea* adj2 allograft*).mp.         | 1048   | Advanced |
| 81  | (pancrea* adj2 allotransplant*).mp.    | 171    | Advanced |
| 82  | (pancrea* adj2 heterograft*).mp.       | 1      | Advanced |
| 83  | (pancrea* adj2 heterotransplant*).mp.  | 1      | Advanced |
| 84  | (pancrea* adj2 homotransplant*).mp.    | 14     | Advanced |
| 85  | (pancrea* adj2 homograft*).mp.         | 9      | Advanced |
| 86  | (lung? adj2 transplant*).mp.           | 21602  | Advanced |
| 87  | (lung? adj2 donor*).mp.                | 1908   | Advanced |
| 88  | (lung? adj2 recipient*).mp.            | 4204   | Advanced |
| 89  | (lung? adj2 graft*).mp.                | 733    | Advanced |
| 90  | (lung? adj2 allograft*).mp.            | 1763   | Advanced |
| 91  | (lung? adj2 allotransplant*).mp.       | 212    | Advanced |
| 92  | (lung? adj2 heterograft*).mp.          | 0      | Advanced |
| 93  | (lung? adj2 heterotransplant*).mp.     | 7      | Advanced |
| 94  | (lung? adj2 homotransplant*).mp.       | 26     | Advanced |
| 95  | (lung? adj2 homograft*).mp.            | 10     | Advanced |
| 96  | (thoracic adj2 transplant*).mp.        | 454    | Advanced |
| 97  | (thoracic adj2 graft*).mp.             | 1461   | Advanced |
| 98  | (thoracic adj2 allograft*).mp.         | 17     | Advanced |
| 99  | (thoracic adj2 allotransplant*).mp.    | 2      | Advanced |
| 100 | (thoracic adj2 heterograft*).mp.       | 0      | Advanced |
| 101 | (thoracic adj2 heterotransplant*).mp.  | 0      | Advanced |
| 102 | (thoracic adj2 homotransplant*).mp.    | 0      | Advanced |
| 103 | (thoracic adj2 homograft*).mp.         | 10     | Advanced |
| 104 | (pulmonary adj2 transplant*).mp.       | 1021   | Advanced |
| 105 | (pulmonary adj2 graft*).mp.            | 356    | Advanced |
| 106 | (pulmonary adj2 allograft*).mp.        | 334    | Advanced |
| 107 | (pulmonary adj2 allotransplant*).mp.   | 15     | Advanced |
| 108 | (pulmonary adj2 heterograft*).mp.      | 10     | Advanced |
| 109 | (pulmonary adj2 heterotransplant*).mp. | 2      | Advanced |
| 110 | (pulmonary adj2 homotransplant*).mp.   | 13     | Advanced |
| 111 | (pulmonary adj2 homograft*).mp.        | 442    | Advanced |
| 112 | (kidney? adj2 transplant*).mp.         | 105711 | Advanced |
| 113 | (kidney? adj2 donor*).mp.              | 8979   | Advanced |
| 114 | (kidney? adj2 recipient*).mp.          | 12908  | Advanced |
| 115 | (kidney? adj2 graft*).mp.              | 4631   | Advanced |
| 116 | (kidney? adj2 allograft*).mp.          | 4260   | Advanced |

|     |                                        |        |          |
|-----|----------------------------------------|--------|----------|
| 117 | (kidney? adj2 allotransplant*).mp.     | 223    | Advanced |
| 118 | (kidney? adj2 heterograft*).mp.        | 2      | Advanced |
| 119 | (kidney? adj2 heterotransplant*).mp.   | 3      | Advanced |
| 120 | (kidney? adj2 homotransplant*).mp.     | 108    | Advanced |
| 121 | (kidney? adj2 homograft*).mp.          | 47     | Advanced |
| 122 | (renal adj2 transplant*).mp.           | 47731  | Advanced |
| 123 | (renal adj2 graft*).mp.                | 3772   | Advanced |
| 124 | (renal adj2 allograft*).mp.            | 12588  | Advanced |
| 125 | (renal adj2 allotransplant*).mp.       | 449    | Advanced |
| 126 | (renal adj2 heterograft*).mp.          | 3      | Advanced |
| 127 | (renal adj2 heterotransplant*).mp.     | 19     | Advanced |
| 128 | (renal adj2 homotransplant*).mp.       | 334    | Advanced |
| 129 | (renal adj2 homograft*).mp.            | 251    | Advanced |
| 130 | (bowel adj2 transplant*).mp.           | 1824   | Advanced |
| 131 | (bowel adj2 donor*).mp.                | 51     | Advanced |
| 132 | (bowel adj2 recipient*).mp.            | 112    | Advanced |
| 133 | (bowel adj2 graft*).mp.                | 273    | Advanced |
| 134 | (bowel adj2 allograft*).mp.            | 292    | Advanced |
| 135 | (bowel adj2 allotransplant*).mp.       | 39     | Advanced |
| 136 | (bowel adj2 heterograft*).mp.          | 0      | Advanced |
| 137 | (bowel adj2 heterotransplant*).mp.     | 0      | Advanced |
| 138 | (bowel adj2 homotransplant*).mp.       | 0      | Advanced |
| 139 | (bowel adj2 homograft*).mp.            | 1      | Advanced |
| 140 | (intestin* adj2 transplant*).mp.       | 2572   | Advanced |
| 141 | (intestin* adj2 donor*).mp.            | 134    | Advanced |
| 142 | (intestin* adj2 recipient*).mp.        | 273    | Advanced |
| 143 | (intestin* adj2 graft*).mp.            | 850    | Advanced |
| 144 | (intestin* adj2 allograft*).mp.        | 334    | Advanced |
| 145 | (intestin* adj2 allotransplant*).mp.   | 35     | Advanced |
| 146 | (intestin* adj2 heterograft*).mp.      | 0      | Advanced |
| 147 | (intestin* adj2 heterotransplant*).mp. | 0      | Advanced |
| 148 | (intestin* adj2 homotransplant*).mp.   | 2      | Advanced |
| 149 | (intestin* adj2 homograft*).mp.        | 1      | Advanced |
| 150 | or/1-149                               | 315496 | Advanced |
| 151 | exp Ethnic Groups/                     | 152424 | Advanced |
| 152 | exp Continental Population Groups/     | 218951 | Advanced |
| 153 | exp Culture/                           | 160142 | Advanced |
| 154 | exp Religion/                          | 60827  | Advanced |
| 155 | exp "Emigrants and Immigrants"/        | 12296  | Advanced |
| 156 | Refugees/                              | 10122  | Advanced |

|     |                                   |         |          |
|-----|-----------------------------------|---------|----------|
| 157 | "Transients and Migrants"/        | 11542   | Advanced |
| 158 | Minority Groups/                  | 13779   | Advanced |
| 159 | Minority Health/                  | 760     | Advanced |
| 160 | Medically Underserved Area/       | 6985    | Advanced |
| 161 | eh.fs.                            | 161529  | Advanced |
| 162 | African.mp.                       | 194320  | Advanced |
| 163 | Asian.mp.                         | 137552  | Advanced |
| 164 | Black.mp.                         | 125411  | Advanced |
| 165 | Person of colour.mp.              | 3       | Advanced |
| 166 | Person of color.mp.               | 27      | Advanced |
| 167 | Non-caucasian*.mp.                | 1782    | Advanced |
| 168 | Noncaucasian.mp.                  | 16      | Advanced |
| 169 | (Diverse adj2 population*).mp.    | 10832   | Advanced |
| 170 | Ethnic*.mp.                       | 178808  | Advanced |
| 171 | Ghetto*.mp.                       | 378     | Advanced |
| 172 | Hispanic*.mp.                     | 58584   | Advanced |
| 173 | Indian?.mp.                       | 99190   | Advanced |
| 174 | Latin?.mp.                        | 47179   | Advanced |
| 175 | Minority.mp.                      | 68352   | Advanced |
| 176 | Minorities.mp.                    | 15335   | Advanced |
| 177 | Native.mp.                        | 212882  | Advanced |
| 178 | Indigenous.mp.                    | 33845   | Advanced |
| 179 | Race?.mp.                         | 115165  | Advanced |
| 180 | Racial*.mp.                       | 43787   | Advanced |
| 181 | Refugee*.mp.                      | 14071   | Advanced |
| 182 | Religio*.mp.                      | 62649   | Advanced |
| 183 | Cultur*.mp.                       | 1746778 | Advanced |
| 184 | Migrant*.mp.                      | 23460   | Advanced |
| 185 | Immigrant*.mp.                    | 29756   | Advanced |
| 186 | (Medically adj2 underserved).mp.  | 7898    | Advanced |
| 187 | (Medically adj2 under-served).mp. | 29      | Advanced |
| 188 | Aboriginal.mp.                    | 8661    | Advanced |
| 189 | Non-white.mp.                     | 3434    | Advanced |
| 190 | Nonwhite.mp.                      | 2915    | Advanced |
| 191 | Ethnocultural.mp.                 | 427     | Advanced |
| 192 | Ethno-cultural.mp.                | 172     | Advanced |
| 193 | Oriental?.mp.                     | 8169    | Advanced |
| 194 | or/151-193                        | 2865693 | Advanced |
| 195 | exp Canada/                       | 157629  | Advanced |
| 196 | Canada.mp.                        | 146196  | Advanced |

|     |                            |        |          |
|-----|----------------------------|--------|----------|
| 197 | Canadian?.mp.              | 61228  | Advanced |
| 198 | Alberta?.mp.               | 12868  | Advanced |
| 199 | British Columbia?.mp.      | 14489  | Advanced |
| 200 | Manitoba?.mp.              | 5132   | Advanced |
| 201 | New Brunswick.mp.          | 1510   | Advanced |
| 202 | Newfoundland.mp.           | 2310   | Advanced |
| 203 | Labrador.mp.               | 3476   | Advanced |
| 204 | Northwest Territories.mp.  | 717    | Advanced |
| 205 | Nova Scotia?.mp.           | 3711   | Advanced |
| 206 | Nunavut.mp.                | 631    | Advanced |
| 207 | Ontario.mp.                | 42414  | Advanced |
| 208 | Prince Edward Island.mp.   | 626    | Advanced |
| 209 | Quebec.mp.                 | 20137  | Advanced |
| 210 | Saskatchewan.mp.           | 3988   | Advanced |
| 211 | Yukon.mp.                  | 695    | Advanced |
| 212 | or/195-211                 | 233226 | Advanced |
| 213 | 150 and 194 and 212        | 300    | Advanced |
| 214 | remove duplicates from 213 | 299    | Advanced |

**Embase** <1974 to 2020 June 19>

Search history sorted by search number ascending

| #  | Searches                       | Results | Type     |
|----|--------------------------------|---------|----------|
| 1  | Organ Transplantation/         | 36187   | Advanced |
| 2  | exp Heart Transplantation/     | 65531   | Advanced |
| 3  | exp Intestine Transplantation/ | 6169    | Advanced |
| 4  | exp Kidney Transplantation/    | 151805  | Advanced |
| 5  | exp Liver Transplantation/     | 115915  | Advanced |
| 6  | exp Lung Transplantation/      | 35415   | Advanced |
| 7  | exp Pancreas Transplantation/  | 20239   | Advanced |
| 8  | Parathyroid Transplantation/   | 325     | Advanced |
| 9  | Spleen Transplantation/        | 478     | Advanced |
| 10 | exp Thymus Transplantation/    | 808     | Advanced |
| 11 | graft recipient/               | 56163   | Advanced |
| 12 | Transplantation/               | 151311  | Advanced |
| 13 | exp organ donor/               | 38565   | Advanced |
| 14 | exp living donor/              | 30716   | Advanced |
| 15 | (living adj3 donor*).mp.       | 36927   | Advanced |
| 16 | (living adj3 donation*).mp.    | 3664    | Advanced |
| 17 | (organ? adj2 transplant*).mp.  | 66837   | Advanced |
| 18 | (organ? adj2 donor*).mp.       | 35168   | Advanced |
| 19 | (organ? adj2 recipient*).mp.   | 8705    | Advanced |

|    |                                              |       |          |
|----|----------------------------------------------|-------|----------|
| 20 | (organ? adj2 graft*).mp.                     | 1348  | Advanced |
| 21 | (organ? adj2 allograft*).mp.                 | 1176  | Advanced |
| 22 | (organ? adj2 allotransplant*).mp.            | 88    | Advanced |
| 23 | (organ? adj2 heterograft*).mp.               | 1     | Advanced |
| 24 | (organ? adj2 heterotransplant*).mp.          | 0     | Advanced |
| 25 | (organ? adj2 homotransplant*).mp.            | 4     | Advanced |
| 26 | (organ? adj2 homograft*).mp.                 | 9     | Advanced |
| 27 | (heart? adj2 transplant*).mp.                | 68580 | Advanced |
| 28 | (heart? adj2 donor*).mp.                     | 7476  | Advanced |
| 29 | (heart? adj2 recipient*).mp.                 | 8579  | Advanced |
| 30 | (heart? adj2 graft*).mp.                     | 16533 | Advanced |
| 31 | (heart? adj2 allograft*).mp.                 | 2209  | Advanced |
| 32 | (heart? adj2 allotransplant*).mp.            | 89    | Advanced |
| 33 | (heart? adj2 heterograft*).mp.               | 15    | Advanced |
| 34 | (heart? adj2 heterotransplant*).mp.          | 0     | Advanced |
| 35 | (heart? adj2 homotransplant*).mp.            | 10    | Advanced |
| 36 | (heart? adj2 homograft*).mp.                 | 57    | Advanced |
| 37 | (cardiac adj2 transplant*).mp.               | 16729 | Advanced |
| 38 | (cardiac adj2 graft*).mp.                    | 5428  | Advanced |
| 39 | (cardiac adj2 allograft*).mp.                | 8772  | Advanced |
| 40 | (cardiac adj2 allotransplant*).mp.           | 94    | Advanced |
| 41 | (cardiac adj2 heterograft*).mp.              | 10    | Advanced |
| 42 | (cardiac adj2 heterotransplant*).mp.         | 3     | Advanced |
| 43 | (cardiac adj2 homotransplant*).mp.           | 3     | Advanced |
| 44 | (cardiac adj2 homograft*).mp.                | 47    | Advanced |
| 45 | (cardiothoracic adj2 transplant*).mp.        | 237   | Advanced |
| 46 | (cardiothoracic adj2 graft*).mp.             | 5     | Advanced |
| 47 | (cardiothoracic adj2 allograft*).mp.         | 0     | Advanced |
| 48 | (cardiothoracic adj2 allotransplant*).mp.    | 0     | Advanced |
| 49 | (cardiothoracic adj2 heterograft*).mp.       | 0     | Advanced |
| 50 | (cardiothoracic adj2 heterotransplant*).mp.  | 0     | Advanced |
| 51 | (cardiothoracic adj2 homotransplant*).mp.    | 0     | Advanced |
| 52 | (cardiothoracic adj2 homograft*).mp.         | 0     | Advanced |
| 53 | (cardiopulmonary adj2 transplant*).mp.       | 315   | Advanced |
| 54 | (cardiopulmonary adj2 graft*).mp.            | 561   | Advanced |
| 55 | (cardiopulmonary adj2 allograft*).mp.        | 3     | Advanced |
| 56 | (cardiopulmonary adj2 allotransplant*).mp.   | 3     | Advanced |
| 57 | (cardiopulmonary adj2 heterograft*).mp.      | 0     | Advanced |
| 58 | (cardiopulmonary adj2 heterotransplant*).mp. | 0     | Advanced |
| 59 | (cardiopulmonary adj2 homotransplant*).mp.   | 0     | Advanced |

|    |                                       |        |          |
|----|---------------------------------------|--------|----------|
| 60 | (cardiopulmonary adj2 homograft*).mp. | 3      | Advanced |
| 61 | (liver? adj2 transplant*).mp.         | 125872 | Advanced |
| 62 | (liver? adj2 donor*).mp.              | 17551  | Advanced |
| 63 | (liver? adj2 recipient*).mp.          | 14510  | Advanced |
| 64 | (liver? adj2 graft*).mp.              | 34165  | Advanced |
| 65 | (liver? adj2 allograft*).mp.          | 3824   | Advanced |
| 66 | (liver? adj2 allotransplant*).mp.     | 88     | Advanced |
| 67 | (liver? adj2 heterograft*).mp.        | 2      | Advanced |
| 68 | (liver? adj2 heterotransplant*).mp.   | 4      | Advanced |
| 69 | (liver? adj2 homotransplant*).mp.     | 12     | Advanced |
| 70 | (liver? adj2 homograft*).mp.          | 28     | Advanced |
| 71 | (hepat* adj2 transplant*).mp.         | 11035  | Advanced |
| 72 | (hepat* adj2 graft*).mp.              | 1306   | Advanced |
| 73 | (hepat* adj2 allograft*).mp.          | 709    | Advanced |
| 74 | (hepat* adj2 allotransplant*).mp.     | 21     | Advanced |
| 75 | (hepat* adj2 heterograft*).mp.        | 0      | Advanced |
| 76 | (hepat* adj2 heterotransplant*).mp.   | 2      | Advanced |
| 77 | (hepat* adj2 homotransplant*).mp.     | 5      | Advanced |
| 78 | (hepat* adj2 homograft*).mp.          | 9      | Advanced |
| 79 | (pancrea* adj2 transplant*).mp.       | 22029  | Advanced |
| 80 | (pancrea* adj2 donor*).mp.            | 1273   | Advanced |
| 81 | (pancrea* adj2 recipient*).mp.        | 1366   | Advanced |
| 82 | (pancrea* adj2 graft*).mp.            | 2819   | Advanced |
| 83 | (pancrea* adj2 allograft*).mp.        | 1426   | Advanced |
| 84 | (pancrea* adj2 allotransplant*).mp.   | 196    | Advanced |
| 85 | (pancrea* adj2 heterograft*).mp.      | 1      | Advanced |
| 86 | (pancrea* adj2 heterotransplant*).mp. | 1      | Advanced |
| 87 | (pancrea* adj2 homotransplant*).mp.   | 8      | Advanced |
| 88 | (pancrea* adj2 homograft*).mp.        | 4      | Advanced |
| 89 | (lung? adj2 transplant*).mp.          | 44183  | Advanced |
| 90 | (lung? adj2 donor*).mp.               | 3630   | Advanced |
| 91 | (lung? adj2 recipient*).mp.           | 7165   | Advanced |
| 92 | (lung? adj2 graft*).mp.               | 3172   | Advanced |
| 93 | (lung? adj2 allograft*).mp.           | 3139   | Advanced |
| 94 | (lung? adj2 allotransplant*).mp.      | 248    | Advanced |
| 95 | (lung? adj2 heterograft*).mp.         | 0      | Advanced |
| 96 | (lung? adj2 heterotransplant*).mp.    | 9      | Advanced |
| 97 | (lung? adj2 homotransplant*).mp.      | 13     | Advanced |
| 98 | (lung? adj2 homograft*).mp.           | 9      | Advanced |
| 99 | (thoracic adj2 transplant*).mp.       | 789    | Advanced |



|     |                                        |        |          |
|-----|----------------------------------------|--------|----------|
| 100 | (thoracic adj2 graft*).mp.             | 1847   | Advanced |
| 101 | (thoracic adj2 allograft*).mp.         | 22     | Advanced |
| 102 | (thoracic adj2 allotransplant*).mp.    | 2      | Advanced |
| 103 | (thoracic adj2 heterograft*).mp.       | 0      | Advanced |
| 104 | (thoracic adj2 heterotransplant*).mp.  | 0      | Advanced |
| 105 | (thoracic adj2 homotransplant*).mp.    | 0      | Advanced |
| 106 | (thoracic adj2 homograft*).mp.         | 12     | Advanced |
| 107 | (pulmonary adj2 transplant*).mp.       | 1610   | Advanced |
| 108 | (pulmonary adj2 graft*).mp.            | 542    | Advanced |
| 109 | (pulmonary adj2 allograft*).mp.        | 426    | Advanced |
| 110 | (pulmonary adj2 allotransplant*).mp.   | 15     | Advanced |
| 111 | (pulmonary adj2 heterograft*).mp.      | 9      | Advanced |
| 112 | (pulmonary adj2 heterotransplant*).mp. | 1      | Advanced |
| 113 | (pulmonary adj2 homotransplant*).mp.   | 3      | Advanced |
| 114 | (pulmonary adj2 homograft*).mp.        | 642    | Advanced |
| 115 | (kidney? adj2 transplant*).mp.         | 143252 | Advanced |
| 116 | (kidney? adj2 donor*).mp.              | 21427  | Advanced |
| 117 | (kidney? adj2 recipient*).mp.          | 22270  | Advanced |
| 118 | (kidney? adj2 graft*).mp.              | 57748  | Advanced |
| 119 | (kidney? adj2 allograft*).mp.          | 18089  | Advanced |
| 120 | (kidney? adj2 allotransplant*).mp.     | 245    | Advanced |
| 121 | (kidney? adj2 heterograft*).mp.        | 1      | Advanced |
| 122 | (kidney? adj2 heterotransplant*).mp.   | 2      | Advanced |
| 123 | (kidney? adj2 homotransplant*).mp.     | 9      | Advanced |
| 124 | (kidney? adj2 homograft*).mp.          | 19     | Advanced |
| 125 | (renal adj2 transplant*).mp.           | 70069  | Advanced |
| 126 | (renal adj2 graft*).mp.                | 7548   | Advanced |
| 127 | (renal adj2 allograft*).mp.            | 17185  | Advanced |
| 128 | (renal adj2 allotransplant*).mp.       | 405    | Advanced |
| 129 | (renal adj2 heterograft*).mp.          | 1      | Advanced |
| 130 | (renal adj2 heterotransplant*).mp.     | 4      | Advanced |
| 131 | (renal adj2 homotransplant*).mp.       | 81     | Advanced |
| 132 | (renal adj2 homograft*).mp.            | 110    | Advanced |
| 133 | (bowel adj2 transplant*).mp.           | 2486   | Advanced |
| 134 | (bowel adj2 donor*).mp.                | 71     | Advanced |
| 135 | (bowel adj2 recipient*).mp.            | 163    | Advanced |
| 136 | (bowel adj2 graft*).mp.                | 361    | Advanced |
| 137 | (bowel adj2 allograft*).mp.            | 340    | Advanced |
| 138 | (bowel adj2 allotransplant*).mp.       | 40     | Advanced |
| 139 | (bowel adj2 heterograft*).mp.          | 0      | Advanced |

|     |                                        |        |          |
|-----|----------------------------------------|--------|----------|
| 140 | (bowel adj2 heterotransplant*).mp.     | 0      | Advanced |
| 141 | (bowel adj2 homotransplant*).mp.       | 1      | Advanced |
| 142 | (bowel adj2 homograft*).mp.            | 2      | Advanced |
| 143 | (intestin* adj2 transplant*).mp.       | 6230   | Advanced |
| 144 | (intestin* adj2 donor*).mp.            | 203    | Advanced |
| 145 | (intestin* adj2 recipient*).mp.        | 465    | Advanced |
| 146 | (intestin* adj2 graft*).mp.            | 3027   | Advanced |
| 147 | (intestin* adj2 allograft*).mp.        | 441    | Advanced |
| 148 | (intestin* adj2 allotransplant*).mp.   | 40     | Advanced |
| 149 | (intestin* adj2 heterograft*).mp.      | 0      | Advanced |
| 150 | (intestin* adj2 heterotransplant*).mp. | 0      | Advanced |
| 151 | (intestin* adj2 homotransplant*).mp.   | 0      | Advanced |
| 152 | (intestin* adj2 homograft*).mp.        | 0      | Advanced |
| 153 | or/1-152                               | 569582 | Advanced |
| 154 | exp ethnic group/                      | 142068 | Advanced |
| 155 | exp ancestry group/                    | 302449 | Advanced |
| 156 | cultural anthropology/                 | 52281  | Advanced |
| 157 | exp religion/                          | 69665  | Advanced |
| 158 | exp migrant/                           | 36726  | Advanced |
| 159 | minority group/                        | 14550  | Advanced |
| 160 | minority health/                       | 805    | Advanced |
| 161 | medically underserved/                 | 1147   | Advanced |
| 162 | African.mp.                            | 212781 | Advanced |
| 163 | Asian.mp.                              | 177986 | Advanced |
| 164 | Black.mp.                              | 167541 | Advanced |
| 165 | Person of colour.mp.                   | 4      | Advanced |
| 166 | Person of color.mp.                    | 32     | Advanced |
| 167 | Non-caucasian*.mp.                     | 3271   | Advanced |
| 168 | Noncaucasian.mp.                       | 38     | Advanced |
| 169 | (Diverse adj2 population*).mp.         | 14645  | Advanced |
| 170 | Ethnic*.mp.                            | 280483 | Advanced |
| 171 | Ghetto*.mp.                            | 319    | Advanced |
| 172 | Hispanic*.mp.                          | 91835  | Advanced |
| 173 | Indian?.mp.                            | 126440 | Advanced |
| 174 | Latin?.mp.                             | 51491  | Advanced |
| 175 | Minority.mp.                           | 90322  | Advanced |
| 176 | Minorities.mp.                         | 15985  | Advanced |
| 177 | Native.mp.                             | 245850 | Advanced |
| 178 | Indigenous.mp.                         | 41435  | Advanced |
| 179 | Race?.mp.                              | 208645 | Advanced |

|     |                                   |         |          |
|-----|-----------------------------------|---------|----------|
| 180 | Racial*.mp.                       | 80674   | Advanced |
| 181 | Refugee*.mp.                      | 15340   | Advanced |
| 182 | Religio*.mp.                      | 86578   | Advanced |
| 183 | Cultur*.mp.                       | 1880993 | Advanced |
| 184 | Migrant*.mp.                      | 25643   | Advanced |
| 185 | Immigrant*.mp.                    | 32568   | Advanced |
| 186 | (Medically adj2 underserved).mp.  | 2630    | Advanced |
| 187 | (Medically adj2 under-served).mp. | 52      | Advanced |
| 188 | Aboriginal.mp.                    | 10781   | Advanced |
| 189 | Non-white.mp.                     | 6216    | Advanced |
| 190 | Nonwhite.mp.                      | 3431    | Advanced |
| 191 | Ethnocultural.mp.                 | 495     | Advanced |
| 192 | Ethno-cultural.mp.                | 211     | Advanced |
| 193 | Oriental?.mp.                     | 11329   | Advanced |
| 194 | or/154-193                        | 3270801 | Advanced |
| 195 | exp Canada/                       | 180659  | Advanced |
| 196 | Canada.mp.                        | 230416  | Advanced |
| 197 | Canadian?.mp.                     | 95940   | Advanced |
| 198 | Alberta?.mp.                      | 12409   | Advanced |
| 199 | British Columbia?.mp.             | 12208   | Advanced |
| 200 | Manitoba?.mp.                     | 4722    | Advanced |
| 201 | New Brunswick.mp.                 | 1394    | Advanced |
| 202 | Newfoundland.mp.                  | 2040    | Advanced |
| 203 | Labrador.mp.                      | 3268    | Advanced |
| 204 | Northwest Territories.mp.         | 618     | Advanced |
| 205 | Nova Scotia?.mp.                  | 3371    | Advanced |
| 206 | Nunavut.mp.                       | 608     | Advanced |
| 207 | Ontario.mp.                       | 39841   | Advanced |
| 208 | Prince Edward Island.mp.          | 556     | Advanced |
| 209 | Quebec.mp.                        | 16775   | Advanced |
| 210 | Saskatchewan.mp.                  | 3441    | Advanced |
| 211 | Yukon.mp.                         | 789     | Advanced |
| 212 | or/195-211                        | 310341  | Advanced |
| 213 | 153 and 194 and 212               | 626     | Advanced |
| 214 | remove duplicates from 213        | 622     | Advanced |

**Cochrane Central Register of Controlled Trials <2014 to Present>**

Search history sorted by search number ascending

| # | Searches                   | Results | Type     |
|---|----------------------------|---------|----------|
| 1 | Organ Transplantation/     | 87      | Advanced |
| 2 | exp Heart Transplantation/ | 657     | Advanced |

|    |                                       |      |          |
|----|---------------------------------------|------|----------|
| 3  | Kidney Transplantation/               | 3534 | Advanced |
| 4  | Liver Transplantation/                | 1175 | Advanced |
| 5  | exp Lung Transplantation/             | 211  | Advanced |
| 6  | Pancreas Transplantation/             | 139  | Advanced |
| 7  | Transplant Recipients/                | 109  | Advanced |
| 8  | Transplantation/                      | 32   | Advanced |
| 9  | Tissue donors/                        | 583  | Advanced |
| 10 | Living donors/                        | 336  | Advanced |
| 11 | exp "Tissue and Organ Procurement"/   | 121  | Advanced |
| 12 | (living adj3 donor*).mp.              | 1482 | Advanced |
| 13 | (living adj3 donation*).mp.           | 114  | Advanced |
| 14 | (organ? adj2 transplant*).mp.         | 1793 | Advanced |
| 15 | (organ? adj2 donor*).mp.              | 567  | Advanced |
| 16 | (organ? adj2 recipient*).mp.          | 451  | Advanced |
| 17 | (organ? adj2 graft*).mp.              | 84   | Advanced |
| 18 | (organ? adj2 allograft*).mp.          | 22   | Advanced |
| 19 | (organ? adj2 allotransplant*).mp.     | 0    | Advanced |
| 20 | (organ? adj2 heterograft*).mp.        | 0    | Advanced |
| 21 | (organ? adj2 heterotransplant*).mp.   | 0    | Advanced |
| 22 | (organ? adj2 homotransplant*).mp.     | 0    | Advanced |
| 23 | (organ? adj2 homograft*).mp.          | 0    | Advanced |
| 24 | (heart? adj2 transplant*).mp.         | 1986 | Advanced |
| 25 | (heart? adj2 donor*).mp.              | 170  | Advanced |
| 26 | (heart? adj2 recipient*).mp.          | 609  | Advanced |
| 27 | (heart? adj2 graft*).mp.              | 940  | Advanced |
| 28 | (heart? adj2 allograft*).mp.          | 58   | Advanced |
| 29 | (heart? adj2 allotransplant*).mp.     | 0    | Advanced |
| 30 | (heart? adj2 heterograft*).mp.        | 0    | Advanced |
| 31 | (heart? adj2 heterotransplant*).mp.   | 0    | Advanced |
| 32 | (heart? adj2 homotransplant*).mp.     | 0    | Advanced |
| 33 | (heart? adj2 homograft*).mp.          | 1    | Advanced |
| 34 | (cardiac adj2 transplant*).mp.        | 601  | Advanced |
| 35 | (cardiac adj2 graft*).mp.             | 169  | Advanced |
| 36 | (cardiac adj2 allograft*).mp.         | 224  | Advanced |
| 37 | (cardiac adj2 allotransplant*).mp.    | 2    | Advanced |
| 38 | (cardiac adj2 heterograft*).mp.       | 0    | Advanced |
| 39 | (cardiac adj2 heterotransplant*).mp.  | 0    | Advanced |
| 40 | (cardiac adj2 homotransplant*).mp.    | 0    | Advanced |
| 41 | (cardiac adj2 homograft*).mp.         | 0    | Advanced |
| 42 | (cardiothoracic adj2 transplant*).mp. | 5    | Advanced |

|    |                                              |      |          |
|----|----------------------------------------------|------|----------|
| 43 | (cardiothoracic adj2 graft*).mp.             | 1    | Advanced |
| 44 | (cardiothoracic adj2 allograft*).mp.         | 0    | Advanced |
| 45 | (cardiothoracic adj2 allotransplant*).mp.    | 0    | Advanced |
| 46 | (cardiothoracic adj2 heterograft*).mp.       | 0    | Advanced |
| 47 | (cardiothoracic adj2 heterotransplant*).mp.  | 0    | Advanced |
| 48 | (cardiothoracic adj2 homotransplant*).mp.    | 0    | Advanced |
| 49 | (cardiothoracic adj2 homograft*).mp.         | 0    | Advanced |
| 50 | (cardiopulmonary adj2 transplant*).mp.       | 12   | Advanced |
| 51 | (cardiopulmonary adj2 graft*).mp.            | 279  | Advanced |
| 52 | (cardiopulmonary adj2 allograft*).mp.        | 1    | Advanced |
| 53 | (cardiopulmonary adj2 allotransplant*).mp.   | 0    | Advanced |
| 54 | (cardiopulmonary adj2 heterograft*).mp.      | 0    | Advanced |
| 55 | (cardiopulmonary adj2 heterotransplant*).mp. | 0    | Advanced |
| 56 | (cardiopulmonary adj2 homotransplant*).mp.   | 0    | Advanced |
| 57 | (cardiopulmonary adj2 homograft*).mp.        | 0    | Advanced |
| 58 | (liver? adj2 transplant*).mp.                | 4831 | Advanced |
| 59 | (liver? adj2 donor*).mp.                     | 590  | Advanced |
| 60 | (liver? adj2 recipient*).mp.                 | 1086 | Advanced |
| 61 | (liver? adj2 graft*).mp.                     | 1054 | Advanced |
| 62 | (liver? adj2 allograft*).mp.                 | 158  | Advanced |
| 63 | (liver? adj2 allotransplant*).mp.            | 3    | Advanced |
| 64 | (liver? adj2 heterograft*).mp.               | 0    | Advanced |
| 65 | (liver? adj2 heterotransplant*).mp.          | 0    | Advanced |
| 66 | (liver? adj2 homotransplant*).mp.            | 0    | Advanced |
| 67 | (liver? adj2 homograft*).mp.                 | 1    | Advanced |
| 68 | (hepat* adj2 transplant*).mp.                | 475  | Advanced |
| 69 | (hepat* adj2 graft*).mp.                     | 237  | Advanced |
| 70 | (hepat* adj2 allograft*).mp.                 | 34   | Advanced |
| 71 | (hepat* adj2 allotransplant*).mp.            | 2    | Advanced |
| 72 | (hepat* adj2 heterograft*).mp.               | 0    | Advanced |
| 73 | (hepat* adj2 heterotransplant*).mp.          | 0    | Advanced |
| 74 | (hepat* adj2 homotransplant*).mp.            | 0    | Advanced |
| 75 | (hepat* adj2 homograft*).mp.                 | 0    | Advanced |
| 76 | (pancrea* adj2 transplant*).mp.              | 425  | Advanced |
| 77 | (pancrea* adj2 donor*).mp.                   | 32   | Advanced |
| 78 | (pancrea* adj2 recipient*).mp.               | 72   | Advanced |
| 79 | (pancrea* adj2 graft*).mp.                   | 151  | Advanced |
| 80 | (pancrea* adj2 allograft*).mp.               | 36   | Advanced |
| 81 | (pancrea* adj2 allotransplant*).mp.          | 7    | Advanced |
| 82 | (pancrea* adj2 heterograft*).mp.             | 1    | Advanced |

|     |                                        |      |          |
|-----|----------------------------------------|------|----------|
| 83  | (pancrea* adj2 heterotransplant*).mp.  | 0    | Advanced |
| 84  | (pancrea* adj2 homotransplant*).mp.    | 0    | Advanced |
| 85  | (pancrea* adj2 homograft*).mp.         | 0    | Advanced |
| 86  | (lung? adj2 transplant*).mp.           | 1211 | Advanced |
| 87  | (lung? adj2 donor*).mp.                | 93   | Advanced |
| 88  | (lung? adj2 recipient*).mp.            | 301  | Advanced |
| 89  | (lung? adj2 graft*).mp.                | 138  | Advanced |
| 90  | (lung? adj2 allograft*).mp.            | 77   | Advanced |
| 91  | (lung? adj2 allotransplant*).mp.       | 1    | Advanced |
| 92  | (lung? adj2 heterograft*).mp.          | 0    | Advanced |
| 93  | (lung? adj2 heterotransplant*).mp.     | 0    | Advanced |
| 94  | (lung? adj2 homotransplant*).mp.       | 0    | Advanced |
| 95  | (lung? adj2 homograft*).mp.            | 0    | Advanced |
| 96  | (thoracic adj2 transplant*).mp.        | 31   | Advanced |
| 97  | (thoracic adj2 graft*).mp.             | 77   | Advanced |
| 98  | (thoracic adj2 allograft*).mp.         | 0    | Advanced |
| 99  | (thoracic adj2 allotransplant*).mp.    | 0    | Advanced |
| 100 | (thoracic adj2 heterograft*).mp.       | 0    | Advanced |
| 101 | (thoracic adj2 heterotransplant*).mp.  | 0    | Advanced |
| 102 | (thoracic adj2 homotransplant*).mp.    | 0    | Advanced |
| 103 | (thoracic adj2 homograft*).mp.         | 0    | Advanced |
| 104 | (pulmonary adj2 transplant*).mp.       | 61   | Advanced |
| 105 | (pulmonary adj2 graft*).mp.            | 29   | Advanced |
| 106 | (pulmonary adj2 allograft*).mp.        | 4    | Advanced |
| 107 | (pulmonary adj2 allotransplant*).mp.   | 0    | Advanced |
| 108 | (pulmonary adj2 heterograft*).mp.      | 0    | Advanced |
| 109 | (pulmonary adj2 heterotransplant*).mp. | 0    | Advanced |
| 110 | (pulmonary adj2 homotransplant*).mp.   | 0    | Advanced |
| 111 | (pulmonary adj2 homograft*).mp.        | 9    | Advanced |
| 112 | (kidney? adj2 transplant*).mp.         | 8415 | Advanced |
| 113 | (kidney? adj2 donor*).mp.              | 1106 | Advanced |
| 114 | (kidney? adj2 recipient*).mp.          | 2602 | Advanced |
| 115 | (kidney? adj2 graft*).mp.              | 2801 | Advanced |
| 116 | (kidney? adj2 allograft*).mp.          | 683  | Advanced |
| 117 | (kidney? adj2 allotransplant*).mp.     | 7    | Advanced |
| 118 | (kidney? adj2 heterograft*).mp.        | 0    | Advanced |
| 119 | (kidney? adj2 heterotransplant*).mp.   | 0    | Advanced |
| 120 | (kidney? adj2 homotransplant*).mp.     | 2    | Advanced |
| 121 | (kidney? adj2 homograft*).mp.          | 1    | Advanced |
| 122 | (renal adj2 transplant*).mp.           | 5904 | Advanced |

|     |                                        |       |          |
|-----|----------------------------------------|-------|----------|
| 123 | (renal adj2 graft*).mp.                | 518   | Advanced |
| 124 | (renal adj2 allograft*).mp.            | 1335  | Advanced |
| 125 | (renal adj2 allotransplant*).mp.       | 22    | Advanced |
| 126 | (renal adj2 heterograft*).mp.          | 0     | Advanced |
| 127 | (renal adj2 heterotransplant*).mp.     | 0     | Advanced |
| 128 | (renal adj2 homotransplant*).mp.       | 3     | Advanced |
| 129 | (renal adj2 homograft*).mp.            | 0     | Advanced |
| 130 | (bowel adj2 transplant*).mp.           | 28    | Advanced |
| 131 | (bowel adj2 donor*).mp.                | 0     | Advanced |
| 132 | (bowel adj2 recipient*).mp.            | 5     | Advanced |
| 133 | (bowel adj2 graft*).mp.                | 1     | Advanced |
| 134 | (bowel adj2 allograft*).mp.            | 1     | Advanced |
| 135 | (bowel adj2 allotransplant*).mp.       | 0     | Advanced |
| 136 | (bowel adj2 heterograft*).mp.          | 0     | Advanced |
| 137 | (bowel adj2 heterotransplant*).mp.     | 0     | Advanced |
| 138 | (bowel adj2 homotransplant*).mp.       | 0     | Advanced |
| 139 | (bowel adj2 homograft*).mp.            | 0     | Advanced |
| 140 | (intestin* adj2 transplant*).mp.       | 77    | Advanced |
| 141 | (intestin* adj2 donor*).mp.            | 13    | Advanced |
| 142 | (intestin* adj2 recipient*).mp.        | 11    | Advanced |
| 143 | (intestin* adj2 graft*).mp.            | 56    | Advanced |
| 144 | (intestin* adj2 allograft*).mp.        | 3     | Advanced |
| 145 | (intestin* adj2 allotransplant*).mp.   | 1     | Advanced |
| 146 | (intestin* adj2 heterograft*).mp.      | 1     | Advanced |
| 147 | (intestin* adj2 heterotransplant*).mp. | 0     | Advanced |
| 148 | (intestin* adj2 homotransplant*).mp.   | 0     | Advanced |
| 149 | (intestin* adj2 homograft*).mp.        | 0     | Advanced |
| 150 | or/1-149                               | 21026 | Advanced |
| 151 | exp Ethnic Groups/                     | 4295  | Advanced |
| 152 | exp Continental Population Groups/     | 6627  | Advanced |
| 153 | exp Culture/                           | 2792  | Advanced |
| 154 | exp Religion/                          | 1149  | Advanced |
| 155 | exp "Emigrants and Immigrants"/        | 169   | Advanced |
| 156 | Refugees/                              | 106   | Advanced |
| 157 | "Transients and Migrants"/             | 71    | Advanced |
| 158 | Minority Groups/                       | 333   | Advanced |
| 159 | Minority Health/                       | 22    | Advanced |
| 160 | Medically Underserved Area/            | 121   | Advanced |
| 161 | eh.fs.                                 | 4083  | Advanced |
| 162 | African.mp.                            | 12183 | Advanced |

|     |                                   |       |          |
|-----|-----------------------------------|-------|----------|
| 163 | Asian.mp.                         | 9613  | Advanced |
| 164 | Black.mp.                         | 7353  | Advanced |
| 165 | Person of colour.mp.              | 0     | Advanced |
| 166 | Person of color.mp.               | 1     | Advanced |
| 167 | Non-caucasian*.mp.                | 184   | Advanced |
| 168 | Noncaucasian.mp.                  | 1     | Advanced |
| 169 | (Diverse adj2 population*).mp.    | 984   | Advanced |
| 170 | Ethnic*.mp.                       | 10962 | Advanced |
| 171 | Ghetto*.mp.                       | 2     | Advanced |
| 172 | Hispanic*.mp.                     | 5965  | Advanced |
| 173 | Indian?.mp.                       | 5069  | Advanced |
| 174 | Latin?.mp.                        | 4232  | Advanced |
| 175 | Minority.mp.                      | 4735  | Advanced |
| 176 | Minorities.mp.                    | 968   | Advanced |
| 177 | Native.mp.                        | 3890  | Advanced |
| 178 | Indigenous.mp.                    | 929   | Advanced |
| 179 | Race?.mp.                         | 10123 | Advanced |
| 180 | Racial*.mp.                       | 2786  | Advanced |
| 181 | Refugee*.mp.                      | 460   | Advanced |
| 182 | Religio*.mp.                      | 1793  | Advanced |
| 183 | Cultur*.mp.                       | 28297 | Advanced |
| 184 | Migrant*.mp.                      | 397   | Advanced |
| 185 | Immigrant*.mp.                    | 769   | Advanced |
| 186 | (Medically adj2 underserved).mp.  | 382   | Advanced |
| 187 | (Medically adj2 under-served).mp. | 10    | Advanced |
| 188 | Aboriginal.mp.                    | 334   | Advanced |
| 189 | Non-white.mp.                     | 505   | Advanced |
| 190 | Nonwhite.mp.                      | 260   | Advanced |
| 191 | Ethnocultural.mp.                 | 15    | Advanced |
| 192 | Ethno-cultural.mp.                | 6     | Advanced |
| 193 | Oriental?.mp.                     | 273   | Advanced |
| 194 | or/151-193                        | 87019 | Advanced |
| 195 | exp Canada/                       | 3517  | Advanced |
| 196 | Canada.mp.                        | 10403 | Advanced |
| 197 | Canadian?.mp.                     | 6289  | Advanced |
| 198 | Alberta?.mp.                      | 874   | Advanced |
| 199 | British Columbia?.mp.             | 616   | Advanced |
| 200 | Manitoba?.mp.                     | 193   | Advanced |
| 201 | New Brunswick.mp.                 | 49    | Advanced |
| 202 | Newfoundland.mp.                  | 62    | Advanced |



|     |                            |       |          |
|-----|----------------------------|-------|----------|
| 203 | Labrador.mp.               | 52    | Advanced |
| 204 | Northwest Territories.mp.  | 7     | Advanced |
| 205 | Nova Scotia?.mp.           | 128   | Advanced |
| 206 | Nunavut.mp.                | 6     | Advanced |
| 207 | Ontario.mp.                | 5804  | Advanced |
| 208 | Prince Edward Island.mp.   | 17    | Advanced |
| 209 | Quebec.mp.                 | 1190  | Advanced |
| 210 | Saskatchewan.mp.           | 148   | Advanced |
| 211 | Yukon.mp.                  | 34    | Advanced |
| 212 | or/195-211                 | 21146 | Advanced |
| 213 | 150 and 194 and 212        | 25    | Advanced |
| 214 | remove duplicates from 213 | 25    | Advanced |

### Cochrane Database of Systematic Reviews <2005 to Present>

Search history sorted by search number ascending

| #  | Searches                               | Results | Type     |
|----|----------------------------------------|---------|----------|
| 1  | (living adj3 donor*).ti,ab.            | 2       | Advanced |
| 2  | (living adj3 donation*).ti,ab.         | 0       | Advanced |
| 3  | (organ? adj2 transplant*).ti,ab.       | 15      | Advanced |
| 4  | (organ? adj2 donor*).ti,ab.            | 3       | Advanced |
| 5  | (organ? adj2 recipient*).ti,ab.        | 9       | Advanced |
| 6  | (organ? adj2 graft*).ti,ab.            | 0       | Advanced |
| 7  | (organ? adj2 allograft*).ti,ab.        | 0       | Advanced |
| 8  | (organ? adj2 allotransplant*).ti,ab.   | 0       | Advanced |
| 9  | (organ? adj2 heterograft*).ti,ab.      | 0       | Advanced |
| 10 | (organ? adj2 heterotransplant*).ti,ab. | 0       | Advanced |
| 11 | (organ? adj2 homotransplant*).ti,ab.   | 0       | Advanced |
| 12 | (organ? adj2 homograft*).ti,ab.        | 0       | Advanced |
| 13 | (heart? adj2 transplant*).ti,ab.       | 9       | Advanced |
| 14 | (heart? adj2 donor*).ti,ab.            | 1       | Advanced |
| 15 | (heart? adj2 recipient*).ti,ab.        | 2       | Advanced |
| 16 | (heart? adj2 graft*).ti,ab.            | 0       | Advanced |
| 17 | (heart? adj2 allograft*).ti,ab.        | 0       | Advanced |
| 18 | (heart? adj2 allotransplant*).ti,ab.   | 0       | Advanced |
| 19 | (heart? adj2 heterograft*).ti,ab.      | 0       | Advanced |
| 20 | (heart? adj2 heterotransplant*).ti,ab. | 0       | Advanced |
| 21 | (heart? adj2 homotransplant*).ti,ab.   | 0       | Advanced |
| 22 | (heart? adj2 homograft*).ti,ab.        | 0       | Advanced |
| 23 | (cardiac adj2 transplant*).ti,ab.      | 4       | Advanced |
| 24 | (cardiac adj2 graft*).ti,ab.           | 0       | Advanced |
| 25 | (cardiac adj2 allograft*).ti,ab.       | 0       | Advanced |

|    |                                                 |    |          |
|----|-------------------------------------------------|----|----------|
| 26 | (cardiac adj2 allotransplant*).ti,ab.           | 0  | Advanced |
| 27 | (cardiac adj2 heterograft*).ti,ab.              | 0  | Advanced |
| 28 | (cardiac adj2 heterotransplant*).ti,ab.         | 0  | Advanced |
| 29 | (cardiac adj2 homotransplant*).ti,ab.           | 0  | Advanced |
| 30 | (cardiac adj2 homograft*).ti,ab.                | 0  | Advanced |
| 31 | (cardiothoracic adj2 transplant*).ti,ab.        | 0  | Advanced |
| 32 | (cardiothoracic adj2 graft*).ti,ab.             | 0  | Advanced |
| 33 | (cardiothoracic adj2 allograft*).ti,ab.         | 0  | Advanced |
| 34 | (cardiothoracic adj2 allotransplant*).ti,ab.    | 0  | Advanced |
| 35 | (cardiothoracic adj2 heterograft*).ti,ab.       | 0  | Advanced |
| 36 | (cardiothoracic adj2 heterotransplant*).ti,ab.  | 0  | Advanced |
| 37 | (cardiothoracic adj2 homotransplant*).ti,ab.    | 0  | Advanced |
| 38 | (cardiothoracic adj2 homograft*).ti,ab.         | 0  | Advanced |
| 39 | (cardiopulmonary adj2 transplant*).ti,ab.       | 0  | Advanced |
| 40 | (cardiopulmonary adj2 graft*).ti,ab.            | 0  | Advanced |
| 41 | (cardiopulmonary adj2 allograft*).ti,ab.        | 0  | Advanced |
| 42 | (cardiopulmonary adj2 allotransplant*).ti,ab.   | 0  | Advanced |
| 43 | (cardiopulmonary adj2 heterograft*).ti,ab.      | 0  | Advanced |
| 44 | (cardiopulmonary adj2 heterotransplant*).ti,ab. | 0  | Advanced |
| 45 | (cardiopulmonary adj2 homotransplant*).ti,ab.   | 0  | Advanced |
| 46 | (cardiopulmonary adj2 homograft*).ti,ab.        | 0  | Advanced |
| 47 | (liver? adj2 transplant*).ti,ab.                | 65 | Advanced |
| 48 | (liver? adj2 donor*).ti,ab.                     | 2  | Advanced |
| 49 | (liver? adj2 recipient*).ti,ab.                 | 11 | Advanced |
| 50 | (liver? adj2 graft*).ti,ab.                     | 4  | Advanced |
| 51 | (liver? adj2 allograft*).ti,ab.                 | 1  | Advanced |
| 52 | (liver? adj2 allotransplant*).ti,ab.            | 0  | Advanced |
| 53 | (liver? adj2 heterograft*).ti,ab.               | 0  | Advanced |
| 54 | (liver? adj2 heterotransplant*).ti,ab.          | 0  | Advanced |
| 55 | (liver? adj2 homotransplant*).ti,ab.            | 0  | Advanced |
| 56 | (liver? adj2 homograft*).ti,ab.                 | 0  | Advanced |
| 57 | (hepat* adj2 transplant*).ti,ab.                | 1  | Advanced |
| 58 | (hepat* adj2 graft*).ti,ab.                     | 0  | Advanced |
| 59 | (hepat* adj2 allograft*).ti,ab.                 | 0  | Advanced |
| 60 | (hepat* adj2 allotransplant*).ti,ab.            | 0  | Advanced |
| 61 | (hepat* adj2 heterograft*).ti,ab.               | 0  | Advanced |
| 62 | (hepat* adj2 heterotransplant*).ti,ab.          | 0  | Advanced |
| 63 | (hepat* adj2 homotransplant*).ti,ab.            | 0  | Advanced |
| 64 | (hepat* adj2 homograft*).ti,ab.                 | 0  | Advanced |
| 65 | (pancrea* adj2 transplant*).ti,ab.              | 5  | Advanced |

|     |                                           |     |          |
|-----|-------------------------------------------|-----|----------|
| 66  | (pancrea* adj2 donor*).ti,ab.             | 0   | Advanced |
| 67  | (pancrea* adj2 recipient*).ti,ab.         | 2   | Advanced |
| 68  | (pancrea* adj2 graft*).ti,ab.             | 0   | Advanced |
| 69  | (pancrea* adj2 allograft*).ti,ab.         | 0   | Advanced |
| 70  | (pancrea* adj2 allotransplant*).ti,ab.    | 0   | Advanced |
| 71  | (pancrea* adj2 heterograft*).ti,ab.       | 0   | Advanced |
| 72  | (pancrea* adj2 heterotransplant*).ti,ab.  | 0   | Advanced |
| 73  | (pancrea* adj2 homotransplant*).ti,ab.    | 0   | Advanced |
| 74  | (pancrea* adj2 homograft*).ti,ab.         | 0   | Advanced |
| 75  | (lung? adj2 transplant*).ti,ab.           | 8   | Advanced |
| 76  | (lung? adj2 donor*).ti,ab.                | 0   | Advanced |
| 77  | (lung? adj2 recipient*).ti,ab.            | 5   | Advanced |
| 78  | (lung? adj2 graft*).ti,ab.                | 0   | Advanced |
| 79  | (lung? adj2 allograft*).ti,ab.            | 0   | Advanced |
| 80  | (lung? adj2 allotransplant*).ti,ab.       | 0   | Advanced |
| 81  | (lung? adj2 heterograft*).ti,ab.          | 0   | Advanced |
| 82  | (lung? adj2 heterotransplant*).ti,ab.     | 0   | Advanced |
| 83  | (lung? adj2 homotransplant*).ti,ab.       | 0   | Advanced |
| 84  | (lung? adj2 homograft*).ti,ab.            | 0   | Advanced |
| 85  | (thoracic adj2 transplant*).ti,ab.        | 0   | Advanced |
| 86  | (thoracic adj2 graft*).ti,ab.             | 1   | Advanced |
| 87  | (thoracic adj2 allograft*).ti,ab.         | 0   | Advanced |
| 88  | (thoracic adj2 allotransplant*).ti,ab.    | 0   | Advanced |
| 89  | (thoracic adj2 heterograft*).ti,ab.       | 0   | Advanced |
| 90  | (thoracic adj2 heterotransplant*).ti,ab.  | 0   | Advanced |
| 91  | (thoracic adj2 homotransplant*).ti,ab.    | 0   | Advanced |
| 92  | (thoracic adj2 homograft*).ti,ab.         | 0   | Advanced |
| 93  | (pulmonary adj2 transplant*).ti,ab.       | 0   | Advanced |
| 94  | (pulmonary adj2 graft*).ti,ab.            | 0   | Advanced |
| 95  | (pulmonary adj2 allograft*).ti,ab.        | 0   | Advanced |
| 96  | (pulmonary adj2 allotransplant*).ti,ab.   | 0   | Advanced |
| 97  | (pulmonary adj2 heterograft*).ti,ab.      | 0   | Advanced |
| 98  | (pulmonary adj2 heterotransplant*).ti,ab. | 0   | Advanced |
| 99  | (pulmonary adj2 homotransplant*).ti,ab.   | 0   | Advanced |
| 100 | (pulmonary adj2 homograft*).ti,ab.        | 0   | Advanced |
| 101 | (kidney? adj2 transplant*).ti,ab.         | 111 | Advanced |
| 102 | (kidney? adj2 donor*).ti,ab.              | 5   | Advanced |
| 103 | (kidney? adj2 recipient*).ti,ab.          | 42  | Advanced |
| 104 | (kidney? adj2 graft*).ti,ab.              | 1   | Advanced |
| 105 | (kidney? adj2 allograft*).ti,ab.          | 0   | Advanced |

|     |                                           |     |          |
|-----|-------------------------------------------|-----|----------|
| 106 | (kidney? adj2 allotransplant*).ti,ab.     | 0   | Advanced |
| 107 | (kidney? adj2 heterograft*).ti,ab.        | 0   | Advanced |
| 108 | (kidney? adj2 heterotransplant*).ti,ab.   | 0   | Advanced |
| 109 | (kidney? adj2 homotransplant*).ti,ab.     | 0   | Advanced |
| 110 | (kidney? adj2 homograft*).ti,ab.          | 0   | Advanced |
| 111 | (renal adj2 transplant*).ti,ab.           | 1   | Advanced |
| 112 | (renal adj2 graft*).ti,ab.                | 1   | Advanced |
| 113 | (renal adj2 allograft*).ti,ab.            | 2   | Advanced |
| 114 | (renal adj2 allotransplant*).ti,ab.       | 0   | Advanced |
| 115 | (renal adj2 heterograft*).ti,ab.          | 0   | Advanced |
| 116 | (renal adj2 heterotransplant*).ti,ab.     | 0   | Advanced |
| 117 | (renal adj2 homotransplant*).ti,ab.       | 0   | Advanced |
| 118 | (renal adj2 homograft*).ti,ab.            | 0   | Advanced |
| 119 | (bowel adj2 transplant*).ti,ab.           | 1   | Advanced |
| 120 | (bowel adj2 donor*).ti,ab.                | 0   | Advanced |
| 121 | (bowel adj2 recipient*).ti,ab.            | 0   | Advanced |
| 122 | (bowel adj2 graft*).ti,ab.                | 0   | Advanced |
| 123 | (bowel adj2 allograft*).ti,ab.            | 0   | Advanced |
| 124 | (bowel adj2 allotransplant*).ti,ab.       | 0   | Advanced |
| 125 | (bowel adj2 heterograft*).ti,ab.          | 0   | Advanced |
| 126 | (bowel adj2 heterotransplant*).ti,ab.     | 0   | Advanced |
| 127 | (bowel adj2 homotransplant*).ti,ab.       | 0   | Advanced |
| 128 | (bowel adj2 homograft*).ti,ab.            | 0   | Advanced |
| 129 | (intestin* adj2 transplant*).ti,ab.       | 0   | Advanced |
| 130 | (intestin* adj2 donor*).ti,ab.            | 0   | Advanced |
| 131 | (intestin* adj2 recipient*).ti,ab.        | 0   | Advanced |
| 132 | (intestin* adj2 graft*).ti,ab.            | 0   | Advanced |
| 133 | (intestin* adj2 allograft*).ti,ab.        | 0   | Advanced |
| 134 | (intestin* adj2 allotransplant*).ti,ab.   | 0   | Advanced |
| 135 | (intestin* adj2 heterograft*).ti,ab.      | 0   | Advanced |
| 136 | (intestin* adj2 heterotransplant*).ti,ab. | 0   | Advanced |
| 137 | (intestin* adj2 homotransplant*).ti,ab.   | 0   | Advanced |
| 138 | (intestin* adj2 homograft*).ti,ab.        | 0   | Advanced |
| 139 | or/1-138                                  | 210 | Advanced |
| 140 | African.ti,ab.                            | 67  | Advanced |
| 141 | Asian.ti,ab.                              | 33  | Advanced |
| 142 | Black.ti,ab.                              | 13  | Advanced |
| 143 | Person of colour.ti,ab.                   | 0   | Advanced |
| 144 | Person of color.ti,ab.                    | 0   | Advanced |
| 145 | Non-caucasian*.ti,ab.                     | 0   | Advanced |

|     |                                      |     |          |
|-----|--------------------------------------|-----|----------|
| 146 | Noncaucasian.ti,ab.                  | 0   | Advanced |
| 147 | (Diverse adj2 population*).ti,ab.    | 1   | Advanced |
| 148 | Ethnic*.ti,ab.                       | 71  | Advanced |
| 149 | Ghetto*.ti,ab.                       | 0   | Advanced |
| 150 | Hispanic*.ti,ab.                     | 4   | Advanced |
| 151 | Indian?.ti,ab.                       | 16  | Advanced |
| 152 | Latin?.ti,ab.                        | 237 | Advanced |
| 153 | Minority.ti,ab.                      | 52  | Advanced |
| 154 | Minorities.ti,ab.                    | 3   | Advanced |
| 155 | Native.ti,ab.                        | 18  | Advanced |
| 156 | Indigenous.ti,ab.                    | 10  | Advanced |
| 157 | Race?.ti,ab.                         | 12  | Advanced |
| 158 | Racial*.ti,ab.                       | 5   | Advanced |
| 159 | Refugee*.ti,ab.                      | 4   | Advanced |
| 160 | Religio*.ti,ab.                      | 6   | Advanced |
| 161 | Cultur*.ti,ab.                       | 130 | Advanced |
| 162 | Migrant*.ti,ab.                      | 3   | Advanced |
| 163 | Immigrant*.ti,ab.                    | 2   | Advanced |
| 164 | (Medically adj2 underserved).ti,ab.  | 0   | Advanced |
| 165 | (Medically adj2 under-served).ti,ab. | 0   | Advanced |
| 166 | Aboriginal.ti,ab.                    | 5   | Advanced |
| 167 | Non-white.ti,ab.                     | 0   | Advanced |
| 168 | Nonwhite.ti,ab.                      | 0   | Advanced |
| 169 | Ethnocultural.ti,ab.                 | 0   | Advanced |
| 170 | Ethno-cultural.ti,ab.                | 0   | Advanced |
| 171 | Oriental?.ti,ab.                     | 1   | Advanced |
| 172 | or/140-171                           | 597 | Advanced |
| 173 | Canada.ti,ab.                        | 61  | Advanced |
| 174 | Canadian?.ti,ab.                     | 15  | Advanced |
| 175 | Alberta?.ti,ab.                      | 1   | Advanced |
| 176 | British Columbia?.ti,ab.             | 0   | Advanced |
| 177 | Manitoba?.ti,ab.                     | 0   | Advanced |
| 178 | New Brunswick.ti,ab.                 | 0   | Advanced |
| 179 | Newfoundland.ti,ab.                  | 0   | Advanced |
| 180 | Labrador.ti,ab.                      | 0   | Advanced |
| 181 | Northwest Territories.ti,ab.         | 0   | Advanced |
| 182 | Nova Scotia?.ti,ab.                  | 1   | Advanced |
| 183 | Nunavut.ti,ab.                       | 0   | Advanced |
| 184 | Ontario.ti,ab.                       | 10  | Advanced |
| 185 | Prince Edward Island.ti,ab.          | 0   | Advanced |

|     |                     |    |          |
|-----|---------------------|----|----------|
| 186 | Quebec.ti,ab.       | 0  | Advanced |
| 187 | Saskatchewan.ti,ab. | 0  | Advanced |
| 188 | Yukon.ti,ab.        | 0  | Advanced |
| 189 | or/173-188          | 85 | Advanced |
| 190 | 139 and 172 and 189 | 0  | Advanced |

| #    | Query                                                           | Limiters/Expanders                                                     | Last Run Via                                                                                                 | Results |
|------|-----------------------------------------------------------------|------------------------------------------------------------------------|--------------------------------------------------------------------------------------------------------------|---------|
| S212 | S193 AND S203                                                   | Expanders - Apply equivalent subjects<br>Search modes - Boolean/Phrase | Interface - EBSCOhost Research Databases<br>Search Screen - Advanced Search Database - CINAHL with Full Text | 98      |
| S211 | TI Labrador OR AB Labrador                                      | Expanders - Apply equivalent subjects<br>Search modes - Boolean/Phrase | Interface - EBSCOhost Research Databases<br>Search Screen - Advanced Search Database - CINAHL with Full Text | 424     |
| S210 | TI Newfoundland OR AB Newfoundland                              | Expanders - Apply equivalent subjects<br>Search modes - Boolean/Phrase | Interface - EBSCOhost Research Databases<br>Search Screen - Advanced Search Database - CINAHL with Full Text | 596     |
| S209 | TI New Brunswick OR AB New Brunswick                            | Expanders - Apply equivalent subjects<br>Search modes - Boolean/Phrase | Interface - EBSCOhost Research Databases<br>Search Screen - Advanced Search Database - CINAHL with Full Text | 514     |
| S208 | TI Manitoba* OR AB Manitoba*                                    | Expanders - Apply equivalent subjects<br>Search modes - Boolean/Phrase | Interface - EBSCOhost Research Databases<br>Search Screen - Advanced Search Database - CINAHL with Full Text | 1,645   |
| S207 | TI British Columbia* OR AB British Columbia*                    | Expanders - Apply equivalent subjects<br>Search modes - Boolean/Phrase | Interface - EBSCOhost Research Databases<br>Search Screen - Advanced Search Database - CINAHL with Full Text | 4,369   |
| S206 | TI Alberta* OR AB Alberta*                                      | Expanders - Apply equivalent subjects<br>Search modes - Boolean/Phrase | Interface - EBSCOhost Research Databases<br>Search Screen - Advanced Search Database - CINAHL with Full Text | 4,612   |
| S205 | TI Canadian* OR AB Canadian*                                    | Expanders - Apply equivalent subjects<br>Search modes - Boolean/Phrase | Interface - EBSCOhost Research Databases<br>Search Screen - Advanced Search Database - CINAHL with Full Text | 32,968  |
| S204 | TI Canada OR AB Canada                                          | Expanders - Apply equivalent subjects<br>Search modes - Boolean/Phrase | Interface - EBSCOhost Research Databases<br>Search Screen - Advanced Search Database - CINAHL with Full Text | 41,156  |
| S203 | S194 OR S204 OR S205 OR S206 OR S207 OR S208 OR S209 OR S210 OR | Expanders - Apply equivalent subjects                                  | Interface - EBSCOhost Research Databases                                                                     | 117,153 |

|      |                                                                      |                                                                        |                                                                                                              |         |
|------|----------------------------------------------------------------------|------------------------------------------------------------------------|--------------------------------------------------------------------------------------------------------------|---------|
|      | S211 OR S195 OR S196 OR S197 OR S198 OR S199 OR S200 OR S201 OR S202 | Search modes - Boolean/Phrase                                          | Search Screen - Advanced Search Database - CINAHL with Full Text                                             |         |
| S202 | TI Yukon OR AB Yukon                                                 | Expanders - Apply equivalent subjects<br>Search modes - Boolean/Phrase | Interface - EBSCOhost Research Databases<br>Search Screen - Advanced Search Database - CINAHL with Full Text | 203     |
| S201 | TI Saskatchewan OR AB Saskatchewan                                   | Expanders - Apply equivalent subjects<br>Search modes - Boolean/Phrase | Interface - EBSCOhost Research Databases<br>Search Screen - Advanced Search Database - CINAHL with Full Text | 1,187   |
| S200 | TI Quebec OR AB Quebec                                               | Expanders - Apply equivalent subjects<br>Search modes - Boolean/Phrase | Interface - EBSCOhost Research Databases<br>Search Screen - Advanced Search Database - CINAHL with Full Text | 5,190   |
| S199 | TI Prince Edward Island OR AB Prince Edward Island                   | Expanders - Apply equivalent subjects<br>Search modes - Boolean/Phrase | Interface - EBSCOhost Research Databases<br>Search Screen - Advanced Search Database - CINAHL with Full Text | 188     |
| S198 | TI Ontario OR AB Ontario                                             | Expanders - Apply equivalent subjects<br>Search modes - Boolean/Phrase | Interface - EBSCOhost Research Databases<br>Search Screen - Advanced Search Database - CINAHL with Full Text | 15,458  |
| S197 | TI Nunavut OR AB Nunavut                                             | Expanders - Apply equivalent subjects<br>Search modes - Boolean/Phrase | Interface - EBSCOhost Research Databases<br>Search Screen - Advanced Search Database - CINAHL with Full Text | 200     |
| S196 | TI Nova Scotia* OR AB Nova Scotia*                                   | Expanders - Apply equivalent subjects<br>Search modes - Boolean/Phrase | Interface - EBSCOhost Research Databases<br>Search Screen - Advanced Search Database - CINAHL with Full Text | 1,468   |
| S195 | TI Northwest Territories OR AB Northwest Territories                 | Expanders - Apply equivalent subjects<br>Search modes - Boolean/Phrase | Interface - EBSCOhost Research Databases<br>Search Screen - Advanced Search Database - CINAHL with Full Text | 129     |
| S194 | (MH "Canada+")                                                       | Expanders - Apply equivalent subjects<br>Search modes - Boolean/Phrase | Interface - EBSCOhost Research Databases<br>Search Screen - Advanced Search Database - CINAHL with Full Text | 109,118 |
| S193 | S149 AND S187                                                        | Expanders - Apply equivalent subjects<br>Search modes - Boolean/Phrase | Interface - EBSCOhost Research Databases<br>Search Screen - Advanced Search Database - CINAHL with Full Text | 4,080   |
| S192 | (MH "Medically Underserved")                                         | Expanders - Apply equivalent subjects<br>Search modes - Boolean/Phrase | Interface - EBSCOhost Research Databases<br>Search Screen - Advanced Search Database - CINAHL with Full Text | 3,519   |

|      |                                                                                                                                                                                                                                                                                                                                              |                                                                        |                                                                                                              |         |
|------|----------------------------------------------------------------------------------------------------------------------------------------------------------------------------------------------------------------------------------------------------------------------------------------------------------------------------------------------|------------------------------------------------------------------------|--------------------------------------------------------------------------------------------------------------|---------|
| S191 | (MH "Minority Groups")                                                                                                                                                                                                                                                                                                                       | Expanders - Apply equivalent subjects<br>Search modes - Boolean/Phrase | Interface - EBSCOhost Research Databases<br>Search Screen - Advanced Search Database - CINAHL with Full Text | 12,722  |
| S190 | (MH "Transients and Migrants")                                                                                                                                                                                                                                                                                                               | Expanders - Apply equivalent subjects<br>Search modes - Boolean/Phrase | Interface - EBSCOhost Research Databases<br>Search Screen - Advanced Search Database - CINAHL with Full Text | 5,097   |
| S189 | (MH "Refugees")                                                                                                                                                                                                                                                                                                                              | Expanders - Apply equivalent subjects<br>Search modes - Boolean/Phrase | Interface - EBSCOhost Research Databases<br>Search Screen - Advanced Search Database - CINAHL with Full Text | 7,637   |
| S188 | (MH "Emigration and Immigration")                                                                                                                                                                                                                                                                                                            | Expanders - Apply equivalent subjects<br>Search modes - Boolean/Phrase | Interface - EBSCOhost Research Databases<br>Search Screen - Advanced Search Database - CINAHL with Full Text | 6,951   |
| S187 | S150 OR S161 OR S172 OR S183 OR S188 OR S189 OR S190 OR S191 OR S192 OR S151 OR S152 OR S153 OR S154 OR S155 OR S156 OR S157 OR S158 OR S159 OR S160 OR S162 OR S163 OR S164 OR S165 OR S166 OR S167 OR S168 OR S169 OR S170 OR S171 OR S173 OR S174 OR S175 OR S176 OR S177 OR S178 OR S179 OR S180 OR S181 OR S182 OR S184 OR S185 OR S186 | Expanders - Apply equivalent subjects<br>Search modes - Boolean/Phrase | Interface - EBSCOhost Research Databases<br>Search Screen - Advanced Search Database - CINAHL with Full Text | 533,396 |
| S186 | TI Oriental* OR AB Oriental*                                                                                                                                                                                                                                                                                                                 | Expanders - Apply equivalent subjects<br>Search modes - Boolean/Phrase | Interface - EBSCOhost Research Databases<br>Search Screen - Advanced Search Database - CINAHL with Full Text | 1,635   |
| S185 | TI Ethno-cultural OR AB Ethno-cultural                                                                                                                                                                                                                                                                                                       | Expanders - Apply equivalent subjects<br>Search modes - Boolean/Phrase | Interface - EBSCOhost Research Databases<br>Search Screen - Advanced Search Database - CINAHL with Full Text | 141     |
| S184 | TI Ethnocultural OR AB Ethnocultural                                                                                                                                                                                                                                                                                                         | Expanders - Apply equivalent subjects<br>Search modes - Boolean/Phrase | Interface - EBSCOhost Research Databases<br>Search Screen - Advanced Search Database - CINAHL with Full Text | 316     |
| S183 | (MH "Immigrants+")                                                                                                                                                                                                                                                                                                                           | Expanders - Apply equivalent subjects<br>Search modes - Boolean/Phrase | Interface - EBSCOhost Research Databases<br>Search Screen - Advanced Search Database - CINAHL with Full Text | 17,531  |
| S182 | TI Nonwhite OR AB Nonwhite                                                                                                                                                                                                                                                                                                                   | Expanders - Apply equivalent subjects<br>Search modes - Boolean/Phrase | Interface - EBSCOhost Research Databases<br>Search Screen - Advanced Search Database - CINAHL with Full Text | 1,569   |



|      |                                                                  |                                                                        |                                                                                                              |         |
|------|------------------------------------------------------------------|------------------------------------------------------------------------|--------------------------------------------------------------------------------------------------------------|---------|
| S181 | TI Non-white OR AB Non-white                                     | Expanders - Apply equivalent subjects<br>Search modes - Boolean/Phrase | Interface - EBSCOhost Research Databases<br>Search Screen - Advanced Search Database - CINAHL with Full Text | 1,917   |
| S180 | TI Aboriginal OR AB Aboriginal                                   | Expanders - Apply equivalent subjects<br>Search modes - Boolean/Phrase | Interface - EBSCOhost Research Databases<br>Search Screen - Advanced Search Database - CINAHL with Full Text | 5,281   |
| S179 | TI (Medically N2 under-served) OR AB (Medically N2 under-served) | Expanders - Apply equivalent subjects<br>Search modes - Boolean/Phrase | Interface - EBSCOhost Research Databases<br>Search Screen - Advanced Search Database - CINAHL with Full Text | 20      |
| S178 | TI (Medically N2 underserved) OR AB (Medically N2 underserved)   | Expanders - Apply equivalent subjects<br>Search modes - Boolean/Phrase | Interface - EBSCOhost Research Databases<br>Search Screen - Advanced Search Database - CINAHL with Full Text | 992     |
| S177 | TI Immigrant* OR AB Immigrant*                                   | Expanders - Apply equivalent subjects<br>Search modes - Boolean/Phrase | Interface - EBSCOhost Research Databases<br>Search Screen - Advanced Search Database - CINAHL with Full Text | 14,786  |
| S176 | TI Migrant* OR AB Migrant*                                       | Expanders - Apply equivalent subjects<br>Search modes - Boolean/Phrase | Interface - EBSCOhost Research Databases<br>Search Screen - Advanced Search Database - CINAHL with Full Text | 7,546   |
| S175 | TI Cultur* OR AB Cultur*                                         | Expanders - Apply equivalent subjects<br>Search modes - Boolean/Phrase | Interface - EBSCOhost Research Databases<br>Search Screen - Advanced Search Database - CINAHL with Full Text | 159,898 |
| S174 | TI Religio* OR AB Religio*                                       | Expanders - Apply equivalent subjects<br>Search modes - Boolean/Phrase | Interface - EBSCOhost Research Databases<br>Search Screen - Advanced Search Database - CINAHL with Full Text | 22,454  |
| S173 | TI Refugee* OR AB Refugee*                                       | Expanders - Apply equivalent subjects<br>Search modes - Boolean/Phrase | Interface - EBSCOhost Research Databases<br>Search Screen - Advanced Search Database - CINAHL with Full Text | 6,274   |
| S172 | (MH "Religion and Religions+")                                   | Expanders - Apply equivalent subjects<br>Search modes - Boolean/Phrase | Interface - EBSCOhost Research Databases<br>Search Screen - Advanced Search Database - CINAHL with Full Text | 50,659  |
| S171 | TI Racial* OR AB Racial*                                         | Expanders - Apply equivalent subjects<br>Search modes - Boolean/Phrase | Interface - EBSCOhost Research Databases<br>Search Screen - Advanced Search Database - CINAHL with Full Text | 24,939  |
| S170 | TI Race* OR AB Race*                                             | Expanders - Apply equivalent subjects                                  | Interface - EBSCOhost Research Databases                                                                     | 49,201  |

|      |                                                            |                                                                        |                                                                                                              |         |
|------|------------------------------------------------------------|------------------------------------------------------------------------|--------------------------------------------------------------------------------------------------------------|---------|
|      |                                                            | Search modes - Boolean/Phrase                                          | Search Screen - Advanced Search Database - CINAHL with Full Text                                             |         |
| S169 | TI Indigenous OR AB Indigenous                             | Expanders - Apply equivalent subjects<br>Search modes - Boolean/Phrase | Interface - EBSCOhost Research Databases<br>Search Screen - Advanced Search Database - CINAHL with Full Text | 9,823   |
| S168 | TI Native OR AB Native                                     | Expanders - Apply equivalent subjects<br>Search modes - Boolean/Phrase | Interface - EBSCOhost Research Databases<br>Search Screen - Advanced Search Database - CINAHL with Full Text | 17,979  |
| S167 | TI Minorities OR AB Minorities                             | Expanders - Apply equivalent subjects<br>Search modes - Boolean/Phrase | Interface - EBSCOhost Research Databases<br>Search Screen - Advanced Search Database - CINAHL with Full Text | 30,554  |
| S166 | TI Minority OR AB Minority                                 | Expanders - Apply equivalent subjects<br>Search modes - Boolean/Phrase | Interface - EBSCOhost Research Databases<br>Search Screen - Advanced Search Database - CINAHL with Full Text | 32,638  |
| S165 | TI Latin* OR AB Latin*                                     | Expanders - Apply equivalent subjects<br>Search modes - Boolean/Phrase | Interface - EBSCOhost Research Databases<br>Search Screen - Advanced Search Database - CINAHL with Full Text | 18,967  |
| S164 | TI Indian* OR AB Indian*                                   | Expanders - Apply equivalent subjects<br>Search modes - Boolean/Phrase | Interface - EBSCOhost Research Databases<br>Search Screen - Advanced Search Database - CINAHL with Full Text | 23,333  |
| S163 | TI Hispanic* OR AB Hispanic*                               | Expanders - Apply equivalent subjects<br>Search modes - Boolean/Phrase | Interface - EBSCOhost Research Databases<br>Search Screen - Advanced Search Database - CINAHL with Full Text | 26,134  |
| S162 | TI Ghetto* OR AB Ghetto*                                   | Expanders - Apply equivalent subjects<br>Search modes - Boolean/Phrase | Interface - EBSCOhost Research Databases<br>Search Screen - Advanced Search Database - CINAHL with Full Text | 86      |
| S161 | (MH "Culture+")                                            | Expanders - Apply equivalent subjects<br>Search modes - Boolean/Phrase | Interface - EBSCOhost Research Databases<br>Search Screen - Advanced Search Database - CINAHL with Full Text | 201,720 |
| S160 | TI Ethnic* OR AB Ethnic*                                   | Expanders - Apply equivalent subjects<br>Search modes - Boolean/Phrase | Interface - EBSCOhost Research Databases<br>Search Screen - Advanced Search Database - CINAHL with Full Text | 66,026  |
| S159 | TI (Diverse N2 population*) OR AB (Diverse N2 population*) | Expanders - Apply equivalent subjects<br>Search modes - Boolean/Phrase | Interface - EBSCOhost Research Databases<br>Search Screen - Advanced Search Database - CINAHL with Full Text | 5,455   |

|      |                                                                                                                                                                                                                                                                                                                                                                                             |                                                                        |                                                                                                              |         |
|------|---------------------------------------------------------------------------------------------------------------------------------------------------------------------------------------------------------------------------------------------------------------------------------------------------------------------------------------------------------------------------------------------|------------------------------------------------------------------------|--------------------------------------------------------------------------------------------------------------|---------|
| S158 | TI Noncaucasian* OR AB Noncaucasian*                                                                                                                                                                                                                                                                                                                                                        | Expanders - Apply equivalent subjects<br>Search modes - Boolean/Phrase | Interface - EBSCOhost Research Databases<br>Search Screen - Advanced Search Database - CINAHL with Full Text | 7       |
| S157 | TI Non-caucasian* OR AB Non-caucasian*                                                                                                                                                                                                                                                                                                                                                      | Expanders - Apply equivalent subjects<br>Search modes - Boolean/Phrase | Interface - EBSCOhost Research Databases<br>Search Screen - Advanced Search Database - CINAHL with Full Text | 559     |
| S156 | TI Person of color OR AB Person of color                                                                                                                                                                                                                                                                                                                                                    | Expanders - Apply equivalent subjects<br>Search modes - Boolean/Phrase | Interface - EBSCOhost Research Databases<br>Search Screen - Advanced Search Database - CINAHL with Full Text | 68      |
| S155 | TI Person of colour OR AB Person of colour                                                                                                                                                                                                                                                                                                                                                  | Expanders - Apply equivalent subjects<br>Search modes - Boolean/Phrase | Interface - EBSCOhost Research Databases<br>Search Screen - Advanced Search Database - CINAHL with Full Text | 68      |
| S154 | TI Black OR AB Black                                                                                                                                                                                                                                                                                                                                                                        | Expanders - Apply equivalent subjects<br>Search modes - Boolean/Phrase | Interface - EBSCOhost Research Databases<br>Search Screen - Advanced Search Database - CINAHL with Full Text | 39,021  |
| S153 | TI Asian OR AB Asian                                                                                                                                                                                                                                                                                                                                                                        | Expanders - Apply equivalent subjects<br>Search modes - Boolean/Phrase | Interface - EBSCOhost Research Databases<br>Search Screen - Advanced Search Database - CINAHL with Full Text | 25,785  |
| S152 | TI African OR AB African                                                                                                                                                                                                                                                                                                                                                                    | Expanders - Apply equivalent subjects<br>Search modes - Boolean/Phrase | Interface - EBSCOhost Research Databases<br>Search Screen - Advanced Search Database - CINAHL with Full Text | 51,822  |
| S151 | (MH "Medically Underserved Area")                                                                                                                                                                                                                                                                                                                                                           | Expanders - Apply equivalent subjects<br>Search modes - Boolean/Phrase | Interface - EBSCOhost Research Databases<br>Search Screen - Advanced Search Database - CINAHL with Full Text | 2,412   |
| S150 | (MH "Ethnic Groups+")                                                                                                                                                                                                                                                                                                                                                                       | Expanders - Apply equivalent subjects<br>Search modes - Boolean/Phrase | Interface - EBSCOhost Research Databases<br>Search Screen - Advanced Search Database - CINAHL with Full Text | 158,796 |
| S149 | S1 OR S2 OR S3 OR S4 OR S5 OR S6 OR S7 OR S8 OR S9 OR S10 OR S11 OR S12 OR S13 OR S14 OR S15 OR S16 OR S17 OR S18 OR S19 OR S20 OR S21 OR S22 OR S23 OR S24 OR S25 OR S26 OR S27 OR S28 OR S29 OR S30 OR S31 OR S32 OR S33 OR S34 OR S35 OR S36 OR S37 OR S38 OR S39 OR S40 OR S41 OR S42 OR S43 OR S44 OR S45 OR S46 OR S47 OR S48 OR S49 OR S50 OR S51 OR S52 OR S53 OR S54 OR S55 OR S56 | Expanders - Apply equivalent subjects<br>Search modes - Boolean/Phrase | Interface - EBSCOhost Research Databases<br>Search Screen - Advanced Search Database - CINAHL with Full Text | 51,788  |

|      |                                                                                                                                                                                                                                                                                                                                                                                                                                                                                                                                                                                                                                                                                                                      |                                                                        |                                                                                                              |    |
|------|----------------------------------------------------------------------------------------------------------------------------------------------------------------------------------------------------------------------------------------------------------------------------------------------------------------------------------------------------------------------------------------------------------------------------------------------------------------------------------------------------------------------------------------------------------------------------------------------------------------------------------------------------------------------------------------------------------------------|------------------------------------------------------------------------|--------------------------------------------------------------------------------------------------------------|----|
|      | OR S57 OR S58 OR S59 OR S60 OR S61 OR S62 OR S63 OR S64 OR S65 OR S66 OR S67 OR S68 OR S69 OR S70 OR S71 OR S72 OR S73 OR S74 OR S75 OR S76 OR S77 OR S78 OR S79 OR S80 OR S81 OR S82 OR S83 OR S84 OR S85 OR S86 OR S87 OR S88 OR S89 OR S90 OR S91 OR S92 OR S93 OR S94 OR S95 OR S96 OR S97 OR S98 OR S99 OR S100 OR S101 OR S102 OR S103 OR S104 OR S105 OR S106 OR S107 OR S108 OR S109 OR S110 OR S111 OR S112 OR S113 OR S114 OR S115 OR S116 OR S117 OR S118 OR S119 OR S120 OR S121 OR S122 OR S123 OR S124 OR S125 OR S126 OR S127 OR S128 OR S129 OR S130 OR S131 OR S132 OR S133 OR S134 OR S135 OR S136 OR S137 OR S138 OR S139 OR S140 OR S141 OR S142 OR S143 OR S144 OR S145 OR S146 OR S147 OR S148 |                                                                        |                                                                                                              |    |
| S148 | TI (intestin* N2 homograft*) OR AB (intestin* N2 homograft*)                                                                                                                                                                                                                                                                                                                                                                                                                                                                                                                                                                                                                                                         | Expanders - Apply equivalent subjects<br>Search modes - Boolean/Phrase | Interface - EBSCOhost Research Databases<br>Search Screen - Advanced Search Database - CINAHL with Full Text | 0  |
| S147 | TI (intestin* N2 homotransplant*) OR AB (intestin* N2 homotransplant*)                                                                                                                                                                                                                                                                                                                                                                                                                                                                                                                                                                                                                                               | Expanders - Apply equivalent subjects<br>Search modes - Boolean/Phrase | Interface - EBSCOhost Research Databases<br>Search Screen - Advanced Search Database - CINAHL with Full Text | 0  |
| S146 | TI (intestin* N2 heterotransplant*) OR AB (intestin* N2 heterotransplant*)                                                                                                                                                                                                                                                                                                                                                                                                                                                                                                                                                                                                                                           | Expanders - Apply equivalent subjects<br>Search modes - Boolean/Phrase | Interface - EBSCOhost Research Databases<br>Search Screen - Advanced Search Database - CINAHL with Full Text | 0  |
| S145 | TI (intestin* N2 heterograft*) OR AB (intestin* N2 heterograft*)                                                                                                                                                                                                                                                                                                                                                                                                                                                                                                                                                                                                                                                     | Expanders - Apply equivalent subjects<br>Search modes - Boolean/Phrase | Interface - EBSCOhost Research Databases<br>Search Screen - Advanced Search Database - CINAHL with Full Text | 0  |
| S144 | TI (intestin* N2 allotransplant*) OR AB (intestin* N2 allotransplant*)                                                                                                                                                                                                                                                                                                                                                                                                                                                                                                                                                                                                                                               | Expanders - Apply equivalent subjects<br>Search modes - Boolean/Phrase | Interface - EBSCOhost Research Databases<br>Search Screen - Advanced Search Database - CINAHL with Full Text | 0  |
| S143 | TI (intestin* N2 allograft*) OR AB (intestin* N2 allograft*)                                                                                                                                                                                                                                                                                                                                                                                                                                                                                                                                                                                                                                                         | Expanders - Apply equivalent subjects<br>Search modes - Boolean/Phrase | Interface - EBSCOhost Research Databases<br>Search Screen - Advanced Search Database - CINAHL with Full Text | 14 |
| S142 | TI (intestin* N2 graft*) OR AB (intestin* N2 graft*)                                                                                                                                                                                                                                                                                                                                                                                                                                                                                                                                                                                                                                                                 | Expanders - Apply equivalent subjects                                  | Interface - EBSCOhost Research Databases                                                                     | 79 |

|      |                                                                    |                                                                        |                                                                                                              |     |
|------|--------------------------------------------------------------------|------------------------------------------------------------------------|--------------------------------------------------------------------------------------------------------------|-----|
|      |                                                                    | Search modes - Boolean/Phrase                                          | Search Screen - Advanced Search Database - CINAHL with Full Text                                             |     |
| S141 | TI (intestin* N2 recipient*) OR AB (intestin* N2 recipient*)       | Expanders - Apply equivalent subjects<br>Search modes - Boolean/Phrase | Interface - EBSCOhost Research Databases<br>Search Screen - Advanced Search Database - CINAHL with Full Text | 43  |
| S140 | TI (intestin* N2 donor*) OR AB (intestin* N2 donor*)               | Expanders - Apply equivalent subjects<br>Search modes - Boolean/Phrase | Interface - EBSCOhost Research Databases<br>Search Screen - Advanced Search Database - CINAHL with Full Text | 9   |
| S139 | TI (intestin* N2 transplant*) OR AB (intestin* N2 transplant*)     | Expanders - Apply equivalent subjects<br>Search modes - Boolean/Phrase | Interface - EBSCOhost Research Databases<br>Search Screen - Advanced Search Database - CINAHL with Full Text | 313 |
| S138 | TI (bowel N2 homograft*) OR AB (bowel N2 homograft*)               | Expanders - Apply equivalent subjects<br>Search modes - Boolean/Phrase | Interface - EBSCOhost Research Databases<br>Search Screen - Advanced Search Database - CINAHL with Full Text | 0   |
| S137 | TI (bowel N2 homotransplant*) OR AB (bowel N2 homotransplant*)     | Expanders - Apply equivalent subjects<br>Search modes - Boolean/Phrase | Interface - EBSCOhost Research Databases<br>Search Screen - Advanced Search Database - CINAHL with Full Text | 0   |
| S136 | TI (bowel N2 heterotransplant*) OR AB (bowel N2 heterotransplant*) | Expanders - Apply equivalent subjects<br>Search modes - Boolean/Phrase | Interface - EBSCOhost Research Databases<br>Search Screen - Advanced Search Database - CINAHL with Full Text | 0   |
| S135 | TI (bowel N2 heterograft*) OR AB (bowel N2 heterograft*)           | Expanders - Apply equivalent subjects<br>Search modes - Boolean/Phrase | Interface - EBSCOhost Research Databases<br>Search Screen - Advanced Search Database - CINAHL with Full Text | 0   |
| S134 | TI (bowel N2 allotransplant*) OR AB (bowel N2 allotransplant*)     | Expanders - Apply equivalent subjects<br>Search modes - Boolean/Phrase | Interface - EBSCOhost Research Databases<br>Search Screen - Advanced Search Database - CINAHL with Full Text | 0   |
| S133 | TI (bowel N2 allograft*) OR AB (bowel N2 allograft*)               | Expanders - Apply equivalent subjects<br>Search modes - Boolean/Phrase | Interface - EBSCOhost Research Databases<br>Search Screen - Advanced Search Database - CINAHL with Full Text | 6   |
| S132 | TI (bowel N2 graft*) OR AB (bowel N2 graft*)                       | Expanders - Apply equivalent subjects<br>Search modes - Boolean/Phrase | Interface - EBSCOhost Research Databases<br>Search Screen - Advanced Search Database - CINAHL with Full Text | 17  |
| S131 | TI (bowel N2 recipient*) OR AB (bowel N2 recipient*)               | Expanders - Apply equivalent subjects<br>Search modes - Boolean/Phrase | Interface - EBSCOhost Research Databases<br>Search Screen - Advanced Search Database - CINAHL with Full Text | 8   |

|      |                                                                    |                                                                        |                                                                                                              |       |
|------|--------------------------------------------------------------------|------------------------------------------------------------------------|--------------------------------------------------------------------------------------------------------------|-------|
| S130 | TI (bowel N2 donor*) OR AB (bowel N2 donor*)                       | Expanders - Apply equivalent subjects<br>Search modes - Boolean/Phrase | Interface - EBSCOhost Research Databases<br>Search Screen - Advanced Search Database - CINAHL with Full Text | 3     |
| S129 | TI (bowel N2 transplant*) OR AB (bowel N2 transplant*)             | Expanders - Apply equivalent subjects<br>Search modes - Boolean/Phrase | Interface - EBSCOhost Research Databases<br>Search Screen - Advanced Search Database - CINAHL with Full Text | 149   |
| S128 | TI (renal N2 homograft*) OR AB (renal N2 homograft*)               | Expanders - Apply equivalent subjects<br>Search modes - Boolean/Phrase | Interface - EBSCOhost Research Databases<br>Search Screen - Advanced Search Database - CINAHL with Full Text | 0     |
| S127 | TI (renal N2 homotransplant*) OR AB (renal N2 homotransplant*)     | Expanders - Apply equivalent subjects<br>Search modes - Boolean/Phrase | Interface - EBSCOhost Research Databases<br>Search Screen - Advanced Search Database - CINAHL with Full Text | 2     |
| S126 | TI (renal N2 heterotransplant*) OR AB (renal N2 heterotransplant*) | Expanders - Apply equivalent subjects<br>Search modes - Boolean/Phrase | Interface - EBSCOhost Research Databases<br>Search Screen - Advanced Search Database - CINAHL with Full Text | 0     |
| S125 | TI (renal N2 heterograft*) OR AB (renal N2 heterograft*)           | Expanders - Apply equivalent subjects<br>Search modes - Boolean/Phrase | Interface - EBSCOhost Research Databases<br>Search Screen - Advanced Search Database - CINAHL with Full Text | 0     |
| S124 | TI (renal N2 allotransplant*) OR AB (renal N2 allotransplant*)     | Expanders - Apply equivalent subjects<br>Search modes - Boolean/Phrase | Interface - EBSCOhost Research Databases<br>Search Screen - Advanced Search Database - CINAHL with Full Text | 2     |
| S123 | TI (renal N2 allograft*) OR AB (renal N2 allograft*)               | Expanders - Apply equivalent subjects<br>Search modes - Boolean/Phrase | Interface - EBSCOhost Research Databases<br>Search Screen - Advanced Search Database - CINAHL with Full Text | 836   |
| S122 | TI (renal N2 graft*) OR AB (renal N2 graft*)                       | Expanders - Apply equivalent subjects<br>Search modes - Boolean/Phrase | Interface - EBSCOhost Research Databases<br>Search Screen - Advanced Search Database - CINAHL with Full Text | 358   |
| S121 | TI (renal N2 transplant*) OR AB (renal N2 transplant*)             | Expanders - Apply equivalent subjects<br>Search modes - Boolean/Phrase | Interface - EBSCOhost Research Databases<br>Search Screen - Advanced Search Database - CINAHL with Full Text | 5,157 |
| S120 | TI (kidney* N2 homograft*) OR AB (kidney* N2 homograft*)           | Expanders - Apply equivalent subjects<br>Search modes - Boolean/Phrase | Interface - EBSCOhost Research Databases<br>Search Screen - Advanced Search Database - CINAHL with Full Text | 0     |
| S119 | TI (kidney* N2 homotransplant*) OR AB (kidney* N2 homotransplant*) | Expanders - Apply equivalent subjects                                  | Interface - EBSCOhost Research Databases                                                                     | 0     |

|      |                                                                            |                                                                        |                                                                                                              |       |
|------|----------------------------------------------------------------------------|------------------------------------------------------------------------|--------------------------------------------------------------------------------------------------------------|-------|
|      |                                                                            | Search modes - Boolean/Phrase                                          | Search Screen - Advanced Search Database - CINAHL with Full Text                                             |       |
| S118 | TI (kidney* N2 heterotransplant*)<br>OR AB (kidney* N2 heterotransplant*)  | Expanders - Apply equivalent subjects<br>Search modes - Boolean/Phrase | Interface - EBSCOhost Research Databases<br>Search Screen - Advanced Search Database - CINAHL with Full Text | 0     |
| S117 | TI (kidney* N2 heterograft*) OR AB (kidney* N2 heterograft*)               | Expanders - Apply equivalent subjects<br>Search modes - Boolean/Phrase | Interface - EBSCOhost Research Databases<br>Search Screen - Advanced Search Database - CINAHL with Full Text | 0     |
| S116 | TI (kidney* N2 allotransplant*) OR AB (kidney* N2 allotransplant*)         | Expanders - Apply equivalent subjects<br>Search modes - Boolean/Phrase | Interface - EBSCOhost Research Databases<br>Search Screen - Advanced Search Database - CINAHL with Full Text | 1     |
| S115 | TI (kidney* N2 allograft*) OR AB (kidney* N2 allograft*)                   | Expanders - Apply equivalent subjects<br>Search modes - Boolean/Phrase | Interface - EBSCOhost Research Databases<br>Search Screen - Advanced Search Database - CINAHL with Full Text | 380   |
| S114 | TI (kidney* N2 graft*) OR AB (kidney* N2 graft*)                           | Expanders - Apply equivalent subjects<br>Search modes - Boolean/Phrase | Interface - EBSCOhost Research Databases<br>Search Screen - Advanced Search Database - CINAHL with Full Text | 430   |
| S113 | TI (kidney* N2 recipient*) OR AB (kidney* N2 recipient*)                   | Expanders - Apply equivalent subjects<br>Search modes - Boolean/Phrase | Interface - EBSCOhost Research Databases<br>Search Screen - Advanced Search Database - CINAHL with Full Text | 1,934 |
| S112 | TI (kidney* N2 donor*) OR AB (kidney* N2 donor*)                           | Expanders - Apply equivalent subjects<br>Search modes - Boolean/Phrase | Interface - EBSCOhost Research Databases<br>Search Screen - Advanced Search Database - CINAHL with Full Text | 1,390 |
| S111 | TI (kidney* N2 transplant*) OR AB (kidney* N2 transplant*)                 | Expanders - Apply equivalent subjects<br>Search modes - Boolean/Phrase | Interface - EBSCOhost Research Databases<br>Search Screen - Advanced Search Database - CINAHL with Full Text | 6,435 |
| S110 | TI (pulmonary N2 homograft*) OR AB (pulmonary N2 homograft*)               | Expanders - Apply equivalent subjects<br>Search modes - Boolean/Phrase | Interface - EBSCOhost Research Databases<br>Search Screen - Advanced Search Database - CINAHL with Full Text | 47    |
| S109 | TI (pulmonary N2 homotransplant*)<br>OR AB (pulmonary N2 homotransplant*)  | Expanders - Apply equivalent subjects<br>Search modes - Boolean/Phrase | Interface - EBSCOhost Research Databases<br>Search Screen - Advanced Search Database - CINAHL with Full Text | 0     |
| S108 | TI (pulmonary N2 heterotransplant*) OR AB (pulmonary N2 heterotransplant*) | Expanders - Apply equivalent subjects<br>Search modes - Boolean/Phrase | Interface - EBSCOhost Research Databases<br>Search Screen - Advanced Search Database - CINAHL with Full Text | 0     |

|      |                                                                          |                                                                        |                                                                                                              |     |
|------|--------------------------------------------------------------------------|------------------------------------------------------------------------|--------------------------------------------------------------------------------------------------------------|-----|
| S107 | TI (pulmonary N2 heterograft*) OR AB (pulmonary N2 heterograft*)         | Expanders - Apply equivalent subjects<br>Search modes - Boolean/Phrase | Interface - EBSCOhost Research Databases<br>Search Screen - Advanced Search Database - CINAHL with Full Text | 1   |
| S106 | TI (pulmonary N2 allotransplant*) OR AB (pulmonary N2 allotransplant*)   | Expanders - Apply equivalent subjects<br>Search modes - Boolean/Phrase | Interface - EBSCOhost Research Databases<br>Search Screen - Advanced Search Database - CINAHL with Full Text | 0   |
| S105 | TI (pulmonary N2 allograft*) OR AB (pulmonary N2 allograft*)             | Expanders - Apply equivalent subjects<br>Search modes - Boolean/Phrase | Interface - EBSCOhost Research Databases<br>Search Screen - Advanced Search Database - CINAHL with Full Text | 33  |
| S104 | TI (pulmonary N2 graft*) OR AB (pulmonary N2 graft*)                     | Expanders - Apply equivalent subjects<br>Search modes - Boolean/Phrase | Interface - EBSCOhost Research Databases<br>Search Screen - Advanced Search Database - CINAHL with Full Text | 64  |
| S103 | TI (pulmonary N2 transplant*) OR AB (pulmonary N2 transplant*)           | Expanders - Apply equivalent subjects<br>Search modes - Boolean/Phrase | Interface - EBSCOhost Research Databases<br>Search Screen - Advanced Search Database - CINAHL with Full Text | 262 |
| S102 | TI (thoracic N2 homograft*) OR AB (thoracic N2 homograft*)               | Expanders - Apply equivalent subjects<br>Search modes - Boolean/Phrase | Interface - EBSCOhost Research Databases<br>Search Screen - Advanced Search Database - CINAHL with Full Text | 0   |
| S101 | TI (thoracic N2 homotransplant*) OR AB (thoracic N2 homotransplant*)     | Expanders - Apply equivalent subjects<br>Search modes - Boolean/Phrase | Interface - EBSCOhost Research Databases<br>Search Screen - Advanced Search Database - CINAHL with Full Text | 0   |
| S100 | TI (thoracic N2 heterotransplant*) OR AB (thoracic N2 heterotransplant*) | Expanders - Apply equivalent subjects<br>Search modes - Boolean/Phrase | Interface - EBSCOhost Research Databases<br>Search Screen - Advanced Search Database - CINAHL with Full Text | 0   |
| S99  | TI (thoracic N2 heterograft*) OR AB (thoracic N2 heterograft*)           | Expanders - Apply equivalent subjects<br>Search modes - Boolean/Phrase | Interface - EBSCOhost Research Databases<br>Search Screen - Advanced Search Database - CINAHL with Full Text | 0   |
| S98  | TI (thoracic N2 allotransplant*) OR AB (thoracic N2 allotransplant*)     | Expanders - Apply equivalent subjects<br>Search modes - Boolean/Phrase | Interface - EBSCOhost Research Databases<br>Search Screen - Advanced Search Database - CINAHL with Full Text | 0   |
| S97  | TI (thoracic N2 allograft*) OR AB (thoracic N2 allograft*)               | Expanders - Apply equivalent subjects<br>Search modes - Boolean/Phrase | Interface - EBSCOhost Research Databases<br>Search Screen - Advanced Search Database - CINAHL with Full Text | 4   |
| S96  | TI (thoracic N2 graft*) OR AB (thoracic N2 graft*)                       | Expanders - Apply equivalent subjects                                  | Interface - EBSCOhost Research Databases                                                                     | 333 |



|     |                                                                    |                                                                        |                                                                                                              |       |
|-----|--------------------------------------------------------------------|------------------------------------------------------------------------|--------------------------------------------------------------------------------------------------------------|-------|
|     |                                                                    | Search modes - Boolean/Phrase                                          | Search Screen - Advanced Search Database - CINAHL with Full Text                                             |       |
| S95 | TI (thoracic N2 transplant*) OR AB (thoracic N2 transplant*)       | Expanders - Apply equivalent subjects<br>Search modes - Boolean/Phrase | Interface - EBSCOhost Research Databases<br>Search Screen - Advanced Search Database - CINAHL with Full Text | 86    |
| S94 | TI (lung* N2 homograft*) OR AB (lung* N2 homograft*)               | Expanders - Apply equivalent subjects<br>Search modes - Boolean/Phrase | Interface - EBSCOhost Research Databases<br>Search Screen - Advanced Search Database - CINAHL with Full Text | 0     |
| S93 | TI (lung* N2 homotransplant*) OR AB (lung* N2 homotransplant*)     | Expanders - Apply equivalent subjects<br>Search modes - Boolean/Phrase | Interface - EBSCOhost Research Databases<br>Search Screen - Advanced Search Database - CINAHL with Full Text | 0     |
| S92 | TI (lung* N2 heterotransplant*) OR AB (lung* N2 heterotransplant*) | Expanders - Apply equivalent subjects<br>Search modes - Boolean/Phrase | Interface - EBSCOhost Research Databases<br>Search Screen - Advanced Search Database - CINAHL with Full Text | 0     |
| S91 | TI (lung* N2 heterograft*) OR AB (lung* N2 heterograft*)           | Expanders - Apply equivalent subjects<br>Search modes - Boolean/Phrase | Interface - EBSCOhost Research Databases<br>Search Screen - Advanced Search Database - CINAHL with Full Text | 0     |
| S90 | TI (lung* N2 allotransplant*) OR AB (lung* N2 allotransplant*)     | Expanders - Apply equivalent subjects<br>Search modes - Boolean/Phrase | Interface - EBSCOhost Research Databases<br>Search Screen - Advanced Search Database - CINAHL with Full Text | 3     |
| S89 | TI (lung* N2 allograft*) OR AB (lung* N2 allograft*)               | Expanders - Apply equivalent subjects<br>Search modes - Boolean/Phrase | Interface - EBSCOhost Research Databases<br>Search Screen - Advanced Search Database - CINAHL with Full Text | 205   |
| S88 | TI (lung* N2 graft*) OR AB (lung* N2 graft*)                       | Expanders - Apply equivalent subjects<br>Search modes - Boolean/Phrase | Interface - EBSCOhost Research Databases<br>Search Screen - Advanced Search Database - CINAHL with Full Text | 98    |
| S87 | TI (lung* N2 recipient*) OR AB (lung* N2 recipient*)               | Expanders - Apply equivalent subjects<br>Search modes - Boolean/Phrase | Interface - EBSCOhost Research Databases<br>Search Screen - Advanced Search Database - CINAHL with Full Text | 758   |
| S86 | TI (lung* N2 donor*) OR AB (lung* N2 donor*)                       | Expanders - Apply equivalent subjects<br>Search modes - Boolean/Phrase | Interface - EBSCOhost Research Databases<br>Search Screen - Advanced Search Database - CINAHL with Full Text | 236   |
| S85 | TI (lung* N2 transplant*) OR AB (lung* N2 transplant*)             | Expanders - Apply equivalent subjects<br>Search modes - Boolean/Phrase | Interface - EBSCOhost Research Databases<br>Search Screen - Advanced Search Database - CINAHL with Full Text | 3,292 |

|     |                                                                          |                                                                        |                                                                                                              |     |
|-----|--------------------------------------------------------------------------|------------------------------------------------------------------------|--------------------------------------------------------------------------------------------------------------|-----|
| S84 | TI (pancrea* N2 homograft*) OR AB (pancrea* N2 homograft*)               | Expanders - Apply equivalent subjects<br>Search modes - Boolean/Phrase | Interface - EBSCOhost Research Databases<br>Search Screen - Advanced Search Database - CINAHL with Full Text | 0   |
| S83 | TI (pancrea* N2 homotransplant*) OR AB (pancrea* N2 homotransplant*)     | Expanders - Apply equivalent subjects<br>Search modes - Boolean/Phrase | Interface - EBSCOhost Research Databases<br>Search Screen - Advanced Search Database - CINAHL with Full Text | 0   |
| S82 | TI (pancrea* N2 heterotransplant*) OR AB (pancrea* N2 heterotransplant*) | Expanders - Apply equivalent subjects<br>Search modes - Boolean/Phrase | Interface - EBSCOhost Research Databases<br>Search Screen - Advanced Search Database - CINAHL with Full Text | 0   |
| S81 | TI (pancrea* N2 heterograft*) OR AB (pancrea* N2 heterograft*)           | Expanders - Apply equivalent subjects<br>Search modes - Boolean/Phrase | Interface - EBSCOhost Research Databases<br>Search Screen - Advanced Search Database - CINAHL with Full Text | 0   |
| S80 | TI (pancrea* N2 allotransplant*) OR AB (pancrea* N2 allotransplant*)     | Expanders - Apply equivalent subjects<br>Search modes - Boolean/Phrase | Interface - EBSCOhost Research Databases<br>Search Screen - Advanced Search Database - CINAHL with Full Text | 7   |
| S79 | TI (pancrea* N2 allograft*) OR AB (pancrea* N2 allograft*)               | Expanders - Apply equivalent subjects<br>Search modes - Boolean/Phrase | Interface - EBSCOhost Research Databases<br>Search Screen - Advanced Search Database - CINAHL with Full Text | 45  |
| S78 | TI (pancrea* N2 graft*) OR AB (pancrea* N2 graft*)                       | Expanders - Apply equivalent subjects<br>Search modes - Boolean/Phrase | Interface - EBSCOhost Research Databases<br>Search Screen - Advanced Search Database - CINAHL with Full Text | 86  |
| S77 | TI (pancrea* N2 recipient*) OR AB (pancrea* N2 recipient*)               | Expanders - Apply equivalent subjects<br>Search modes - Boolean/Phrase | Interface - EBSCOhost Research Databases<br>Search Screen - Advanced Search Database - CINAHL with Full Text | 105 |
| S76 | TI (pancrea* N2 donor*) OR AB (pancrea* N2 donor*)                       | Expanders - Apply equivalent subjects<br>Search modes - Boolean/Phrase | Interface - EBSCOhost Research Databases<br>Search Screen - Advanced Search Database - CINAHL with Full Text | 76  |
| S75 | TI (pancrea* N2 transplant*) OR AB (pancrea* N2 transplant*)             | Expanders - Apply equivalent subjects<br>Search modes - Boolean/Phrase | Interface - EBSCOhost Research Databases<br>Search Screen - Advanced Search Database - CINAHL with Full Text | 761 |
| S74 | TI (hepat* N2 homograft*) OR AB (hepat* N2 homograft*)                   | Expanders - Apply equivalent subjects<br>Search modes - Boolean/Phrase | Interface - EBSCOhost Research Databases<br>Search Screen - Advanced Search Database - CINAHL with Full Text | 0   |
| S73 | TI (hepat* N2 homotransplant*) OR AB (hepat* N2 homotransplant*)         | Expanders - Apply equivalent subjects                                  | Interface - EBSCOhost Research Databases                                                                     | 0   |

|     |                                                                      |                                                                        |                                                                                                              |     |
|-----|----------------------------------------------------------------------|------------------------------------------------------------------------|--------------------------------------------------------------------------------------------------------------|-----|
|     |                                                                      | Search modes - Boolean/Phrase                                          | Search Screen - Advanced Search Database - CINAHL with Full Text                                             |     |
| S72 | TI (hepat* N2 heterotransplant*) OR AB (hepat* N2 heterotransplant*) | Expanders - Apply equivalent subjects<br>Search modes - Boolean/Phrase | Interface - EBSCOhost Research Databases<br>Search Screen - Advanced Search Database - CINAHL with Full Text | 0   |
| S71 | TI (hepat* N2 heterograft*) OR AB (hepat* N2 heterograft*)           | Expanders - Apply equivalent subjects<br>Search modes - Boolean/Phrase | Interface - EBSCOhost Research Databases<br>Search Screen - Advanced Search Database - CINAHL with Full Text | 0   |
| S70 | TI (hepat* N2 allotransplant*) OR AB (hepat* N2 allotransplant*)     | Expanders - Apply equivalent subjects<br>Search modes - Boolean/Phrase | Interface - EBSCOhost Research Databases<br>Search Screen - Advanced Search Database - CINAHL with Full Text | 0   |
| S69 | TI (hepat* N2 allograft*) OR AB (hepat* N2 allograft*)               | Expanders - Apply equivalent subjects<br>Search modes - Boolean/Phrase | Interface - EBSCOhost Research Databases<br>Search Screen - Advanced Search Database - CINAHL with Full Text | 29  |
| S68 | TI (hepat* N2 graft*) OR AB (hepat* N2 graft*)                       | Expanders - Apply equivalent subjects<br>Search modes - Boolean/Phrase | Interface - EBSCOhost Research Databases<br>Search Screen - Advanced Search Database - CINAHL with Full Text | 69  |
| S67 | TI (hepat* N2 transplant*) OR AB (hepat* N2 transplant*)             | Expanders - Apply equivalent subjects<br>Search modes - Boolean/Phrase | Interface - EBSCOhost Research Databases<br>Search Screen - Advanced Search Database - CINAHL with Full Text | 737 |
| S66 | TI (liver* N2 homograft*) OR AB (liver* N2 homograft*)               | Expanders - Apply equivalent subjects<br>Search modes - Boolean/Phrase | Interface - EBSCOhost Research Databases<br>Search Screen - Advanced Search Database - CINAHL with Full Text | 1   |
| S65 | TI (liver* N2 homotransplant*) OR AB (liver* N2 homotransplant*)     | Expanders - Apply equivalent subjects<br>Search modes - Boolean/Phrase | Interface - EBSCOhost Research Databases<br>Search Screen - Advanced Search Database - CINAHL with Full Text | 0   |
| S64 | TI (liver* N2 heterotransplant*) OR AB (liver* N2 heterotransplant*) | Expanders - Apply equivalent subjects<br>Search modes - Boolean/Phrase | Interface - EBSCOhost Research Databases<br>Search Screen - Advanced Search Database - CINAHL with Full Text | 0   |
| S63 | TI (liver* N2 heterograft*) OR AB (liver* N2 heterograft*)           | Expanders - Apply equivalent subjects<br>Search modes - Boolean/Phrase | Interface - EBSCOhost Research Databases<br>Search Screen - Advanced Search Database - CINAHL with Full Text | 0   |
| S62 | TI (liver* N2 allotransplant*) OR AB (liver* N2 allotransplant*)     | Expanders - Apply equivalent subjects<br>Search modes - Boolean/Phrase | Interface - EBSCOhost Research Databases<br>Search Screen - Advanced Search Database - CINAHL with Full Text | 2   |

|     |                                                                                        |                                                                        |                                                                                                              |       |
|-----|----------------------------------------------------------------------------------------|------------------------------------------------------------------------|--------------------------------------------------------------------------------------------------------------|-------|
| S61 | TI (liver* N2 allograft*) OR AB (liver* N2 allograft*)                                 | Expanders - Apply equivalent subjects<br>Search modes - Boolean/Phrase | Interface - EBSCOhost Research Databases<br>Search Screen - Advanced Search Database - CINAHL with Full Text | 97    |
| S60 | TI (liver* N2 graft*) OR AB (liver* N2 graft*)                                         | Expanders - Apply equivalent subjects<br>Search modes - Boolean/Phrase | Interface - EBSCOhost Research Databases<br>Search Screen - Advanced Search Database - CINAHL with Full Text | 317   |
| S59 | TI (liver* N2 recipient*) OR AB (liver* N2 recipient*)                                 | Expanders - Apply equivalent subjects<br>Search modes - Boolean/Phrase | Interface - EBSCOhost Research Databases<br>Search Screen - Advanced Search Database - CINAHL with Full Text | 1,019 |
| S58 | TI (liver* N2 donor*) OR AB (liver* N2 donor*)                                         | Expanders - Apply equivalent subjects<br>Search modes - Boolean/Phrase | Interface - EBSCOhost Research Databases<br>Search Screen - Advanced Search Database - CINAHL with Full Text | 869   |
| S57 | TI (liver* N2 transplant*) OR AB (liver* N2 transplant*)                               | Expanders - Apply equivalent subjects<br>Search modes - Boolean/Phrase | Interface - EBSCOhost Research Databases<br>Search Screen - Advanced Search Database - CINAHL with Full Text | 7,446 |
| S56 | TI (cardiopulmonary N2 homograft*) OR AB (cardiopulmonary N2 homograft*)               | Expanders - Apply equivalent subjects<br>Search modes - Boolean/Phrase | Interface - EBSCOhost Research Databases<br>Search Screen - Advanced Search Database - CINAHL with Full Text | 1     |
| S55 | TI (cardiopulmonary N2 homotransplant*) OR AB (cardiopulmonary N2 homotransplant*)     | Expanders - Apply equivalent subjects<br>Search modes - Boolean/Phrase | Interface - EBSCOhost Research Databases<br>Search Screen - Advanced Search Database - CINAHL with Full Text | 0     |
| S54 | TI (cardiopulmonary N2 heterotransplant*) OR AB (cardiopulmonary N2 heterotransplant*) | Expanders - Apply equivalent subjects<br>Search modes - Boolean/Phrase | Interface - EBSCOhost Research Databases<br>Search Screen - Advanced Search Database - CINAHL with Full Text | 0     |
| S53 | TI (cardiopulmonary N2 heterograft*) OR AB (cardiopulmonary N2 heterograft*)           | Expanders - Apply equivalent subjects<br>Search modes - Boolean/Phrase | Interface - EBSCOhost Research Databases<br>Search Screen - Advanced Search Database - CINAHL with Full Text | 0     |
| S52 | TI (cardiopulmonary N2 allotransplant*) OR AB (cardiopulmonary N2 allotransplant*)     | Expanders - Apply equivalent subjects<br>Search modes - Boolean/Phrase | Interface - EBSCOhost Research Databases<br>Search Screen - Advanced Search Database - CINAHL with Full Text | 0     |
| S51 | TI (cardiopulmonary N2 allograft*) OR AB (cardiopulmonary N2 allograft*)               | Expanders - Apply equivalent subjects<br>Search modes - Boolean/Phrase | Interface - EBSCOhost Research Databases<br>Search Screen - Advanced Search Database - CINAHL with Full Text | 1     |
| S50 | TI (cardiopulmonary N2 graft*) OR AB (cardiopulmonary N2 graft*)                       | Expanders - Apply equivalent subjects                                  | Interface - EBSCOhost Research Databases                                                                     | 126   |

|     |                                                                                      |                                                                        |                                                                                                              |    |
|-----|--------------------------------------------------------------------------------------|------------------------------------------------------------------------|--------------------------------------------------------------------------------------------------------------|----|
|     |                                                                                      | Search modes - Boolean/Phrase                                          | Search Screen - Advanced Search Database - CINAHL with Full Text                                             |    |
| S49 | TI (cardiopulmonary N2 transplant*)<br>OR AB (cardiopulmonary N2 transplant*)        | Expanders - Apply equivalent subjects<br>Search modes - Boolean/Phrase | Interface - EBSCOhost Research Databases<br>Search Screen - Advanced Search Database - CINAHL with Full Text | 38 |
| S48 | TI (cardiothoracic N2 homograft*)<br>OR AB (cardiothoracic N2 homograft*)            | Expanders - Apply equivalent subjects<br>Search modes - Boolean/Phrase | Interface - EBSCOhost Research Databases<br>Search Screen - Advanced Search Database - CINAHL with Full Text | 0  |
| S47 | TI (cardiothoracic N2 homotransplant*) OR AB (cardiothoracic N2 homotransplant*)     | Expanders - Apply equivalent subjects<br>Search modes - Boolean/Phrase | Interface - EBSCOhost Research Databases<br>Search Screen - Advanced Search Database - CINAHL with Full Text | 0  |
| S46 | TI (cardiothoracic N2 heterotransplant*) OR AB (cardiothoracic N2 heterotransplant*) | Expanders - Apply equivalent subjects<br>Search modes - Boolean/Phrase | Interface - EBSCOhost Research Databases<br>Search Screen - Advanced Search Database - CINAHL with Full Text | 0  |
| S45 | TI (cardiothoracic N2 heterograft*)<br>OR AB (cardiothoracic N2 heterograft*)        | Expanders - Apply equivalent subjects<br>Search modes - Boolean/Phrase | Interface - EBSCOhost Research Databases<br>Search Screen - Advanced Search Database - CINAHL with Full Text | 0  |
| S44 | TI (cardiothoracic N2 allotransplant*) OR AB (cardiothoracic N2 allotransplant*)     | Expanders - Apply equivalent subjects<br>Search modes - Boolean/Phrase | Interface - EBSCOhost Research Databases<br>Search Screen - Advanced Search Database - CINAHL with Full Text | 0  |
| S43 | TI (cardiothoracic N2 allograft*) OR AB (cardiothoracic N2 allograft*)               | Expanders - Apply equivalent subjects<br>Search modes - Boolean/Phrase | Interface - EBSCOhost Research Databases<br>Search Screen - Advanced Search Database - CINAHL with Full Text | 0  |
| S42 | TI (cardiothoracic N2 graft*) OR AB (cardiothoracic N2 graft*)                       | Expanders - Apply equivalent subjects<br>Search modes - Boolean/Phrase | Interface - EBSCOhost Research Databases<br>Search Screen - Advanced Search Database - CINAHL with Full Text | 1  |
| S41 | TI (cardiothoracic N2 transplant*)<br>OR AB (cardiothoracic N2 transplant*)          | Expanders - Apply equivalent subjects<br>Search modes - Boolean/Phrase | Interface - EBSCOhost Research Databases<br>Search Screen - Advanced Search Database - CINAHL with Full Text | 37 |
| S40 | TI (cardiac N2 homograft*) OR AB (cardiac N2 homograft*)                             | Expanders - Apply equivalent subjects<br>Search modes - Boolean/Phrase | Interface - EBSCOhost Research Databases<br>Search Screen - Advanced Search Database - CINAHL with Full Text | 4  |
| S39 | TI (cardiac N2 homotransplant*) OR AB (cardiac N2 homotransplant*)                   | Expanders - Apply equivalent subjects<br>Search modes - Boolean/Phrase | Interface - EBSCOhost Research Databases<br>Search Screen - Advanced Search Database - CINAHL with Full Text | 0  |

|     |                                                                           |                                                                        |                                                                                                              |       |
|-----|---------------------------------------------------------------------------|------------------------------------------------------------------------|--------------------------------------------------------------------------------------------------------------|-------|
| S38 | TI (cardiac N2 heterotransplant*)<br>OR AB (cardiac N2 heterotransplant*) | Expanders - Apply equivalent subjects<br>Search modes - Boolean/Phrase | Interface - EBSCOhost Research Databases<br>Search Screen - Advanced Search Database - CINAHL with Full Text | 0     |
| S37 | TI (cardiac N2 heterograft*) OR AB (cardiac N2 heterograft*)              | Expanders - Apply equivalent subjects<br>Search modes - Boolean/Phrase | Interface - EBSCOhost Research Databases<br>Search Screen - Advanced Search Database - CINAHL with Full Text | 0     |
| S36 | TI (cardiac N2 allotransplant*) OR AB (cardiac N2 allotransplant*)        | Expanders - Apply equivalent subjects<br>Search modes - Boolean/Phrase | Interface - EBSCOhost Research Databases<br>Search Screen - Advanced Search Database - CINAHL with Full Text | 3     |
| S35 | TI (cardiac N2 allograft*) OR AB (cardiac N2 allograft*)                  | Expanders - Apply equivalent subjects<br>Search modes - Boolean/Phrase | Interface - EBSCOhost Research Databases<br>Search Screen - Advanced Search Database - CINAHL with Full Text | 451   |
| S34 | TI (cardiac N2 graft*) OR AB (cardiac N2 graft*)                          | Expanders - Apply equivalent subjects<br>Search modes - Boolean/Phrase | Interface - EBSCOhost Research Databases<br>Search Screen - Advanced Search Database - CINAHL with Full Text | 160   |
| S33 | TI (cardiac N2 transplant*) OR AB (cardiac N2 transplant*)                | Expanders - Apply equivalent subjects<br>Search modes - Boolean/Phrase | Interface - EBSCOhost Research Databases<br>Search Screen - Advanced Search Database - CINAHL with Full Text | 1,900 |
| S32 | TI (heart* N2 homograft*) OR AB (heart* N2 homograft*)                    | Expanders - Apply equivalent subjects<br>Search modes - Boolean/Phrase | Interface - EBSCOhost Research Databases<br>Search Screen - Advanced Search Database - CINAHL with Full Text | 8     |
| S31 | TI (heart* N2 homotransplant*) OR AB (heart* N2 homotransplant*)          | Expanders - Apply equivalent subjects<br>Search modes - Boolean/Phrase | Interface - EBSCOhost Research Databases<br>Search Screen - Advanced Search Database - CINAHL with Full Text | 0     |
| S30 | TI (heart* N2 heterotransplant*) OR AB (heart* N2 heterotransplant*)      | Expanders - Apply equivalent subjects<br>Search modes - Boolean/Phrase | Interface - EBSCOhost Research Databases<br>Search Screen - Advanced Search Database - CINAHL with Full Text | 0     |
| S29 | TI (heart* N2 heterograft*) OR AB (heart* N2 heterograft*)                | Expanders - Apply equivalent subjects<br>Search modes - Boolean/Phrase | Interface - EBSCOhost Research Databases<br>Search Screen - Advanced Search Database - CINAHL with Full Text | 0     |
| S28 | TI (heart* N2 allotransplant*) OR AB (heart* N2 allotransplant*)          | Expanders - Apply equivalent subjects<br>Search modes - Boolean/Phrase | Interface - EBSCOhost Research Databases<br>Search Screen - Advanced Search Database - CINAHL with Full Text | 3     |
| S27 | TI (heart* N2 allograft*) OR AB (heart* N2 allograft*)                    | Expanders - Apply equivalent subjects                                  | Interface - EBSCOhost Research Databases                                                                     | 95    |

|     |                                                                      |                                                                        |                                                                                                              |       |
|-----|----------------------------------------------------------------------|------------------------------------------------------------------------|--------------------------------------------------------------------------------------------------------------|-------|
|     |                                                                      | Search modes - Boolean/Phrase                                          | Search Screen - Advanced Search Database - CINAHL with Full Text                                             |       |
| S26 | TI (heart* N2 graft*) OR AB (heart* N2 graft*)                       | Expanders - Apply equivalent subjects<br>Search modes - Boolean/Phrase | Interface - EBSCOhost Research Databases<br>Search Screen - Advanced Search Database - CINAHL with Full Text | 154   |
| S25 | TI (heart* N2 recipient*) OR AB (heart* N2 recipient*)               | Expanders - Apply equivalent subjects<br>Search modes - Boolean/Phrase | Interface - EBSCOhost Research Databases<br>Search Screen - Advanced Search Database - CINAHL with Full Text | 913   |
| S24 | TI (heart* N2 donor*) OR AB (heart* N2 donor*)                       | Expanders - Apply equivalent subjects<br>Search modes - Boolean/Phrase | Interface - EBSCOhost Research Databases<br>Search Screen - Advanced Search Database - CINAHL with Full Text | 527   |
| S23 | TI (heart* N2 transplant*) OR AB (heart* N2 transplant*)             | Expanders - Apply equivalent subjects<br>Search modes - Boolean/Phrase | Interface - EBSCOhost Research Databases<br>Search Screen - Advanced Search Database - CINAHL with Full Text | 4,746 |
| S22 | TI (organ* N2 homograft*) OR AB (organ* N2 homograft*)               | Expanders - Apply equivalent subjects<br>Search modes - Boolean/Phrase | Interface - EBSCOhost Research Databases<br>Search Screen - Advanced Search Database - CINAHL with Full Text | 1     |
| S21 | TI (organ* N2 homotransplant*) OR AB (organ* N2 homotransplant*)     | Expanders - Apply equivalent subjects<br>Search modes - Boolean/Phrase | Interface - EBSCOhost Research Databases<br>Search Screen - Advanced Search Database - CINAHL with Full Text | 0     |
| S20 | TI (organ* N2 heterotransplant*) OR AB (organ* N2 heterotransplant*) | Expanders - Apply equivalent subjects<br>Search modes - Boolean/Phrase | Interface - EBSCOhost Research Databases<br>Search Screen - Advanced Search Database - CINAHL with Full Text | 0     |
| S19 | TI (organ* N2 heterograft*) OR AB (organ* N2 heterograft*)           | Expanders - Apply equivalent subjects<br>Search modes - Boolean/Phrase | Interface - EBSCOhost Research Databases<br>Search Screen - Advanced Search Database - CINAHL with Full Text | 0     |
| S18 | TI (organ* N2 allotransplant*) OR AB (organ* N2 allotransplant*)     | Expanders - Apply equivalent subjects<br>Search modes - Boolean/Phrase | Interface - EBSCOhost Research Databases<br>Search Screen - Advanced Search Database - CINAHL with Full Text | 3     |
| S17 | TI (organ* N2 allograft*) OR AB (organ* N2 allograft*)               | Expanders - Apply equivalent subjects<br>Search modes - Boolean/Phrase | Interface - EBSCOhost Research Databases<br>Search Screen - Advanced Search Database - CINAHL with Full Text | 54    |
| S16 | TI (organ* N2 graft*) OR AB (organ* N2 graft*)                       | Expanders - Apply equivalent subjects<br>Search modes - Boolean/Phrase | Interface - EBSCOhost Research Databases<br>Search Screen - Advanced Search Database - CINAHL with Full Text | 112   |

|     |                                                          |                                                                        |                                                                                                              |       |
|-----|----------------------------------------------------------|------------------------------------------------------------------------|--------------------------------------------------------------------------------------------------------------|-------|
| S15 | TI (organ* N2 recipient*) OR AB (organ* N2 recipient*)   | Expanders - Apply equivalent subjects<br>Search modes - Boolean/Phrase | Interface - EBSCOhost Research Databases<br>Search Screen - Advanced Search Database - CINAHL with Full Text | 1,153 |
| S14 | TI (organ* N2 donor*) OR AB (organ* N2 donor*)           | Expanders - Apply equivalent subjects<br>Search modes - Boolean/Phrase | Interface - EBSCOhost Research Databases<br>Search Screen - Advanced Search Database - CINAHL with Full Text | 2,471 |
| S13 | TI (organ* N2 transplant*) OR AB (organ* N2 transplant*) | Expanders - Apply equivalent subjects<br>Search modes - Boolean/Phrase | Interface - EBSCOhost Research Databases<br>Search Screen - Advanced Search Database - CINAHL with Full Text | 5,482 |
| S12 | TI (living N3 donation*) OR AB (living N3 donation*)     | Expanders - Apply equivalent subjects<br>Search modes - Boolean/Phrase | Interface - EBSCOhost Research Databases<br>Search Screen - Advanced Search Database - CINAHL with Full Text | 512   |
| S11 | TI (living N3 donor*) OR AB (living N3 donor*)           | Expanders - Apply equivalent subjects<br>Search modes - Boolean/Phrase | Interface - EBSCOhost Research Databases<br>Search Screen - Advanced Search Database - CINAHL with Full Text | 1,944 |
| S10 | (MH "Organ Procurement+")                                | Expanders - Apply equivalent subjects<br>Search modes - Boolean/Phrase | Interface - EBSCOhost Research Databases<br>Search Screen - Advanced Search Database - CINAHL with Full Text | 7,496 |
| S9  | (MH "Transplant Donors+")                                | Expanders - Apply equivalent subjects<br>Search modes - Boolean/Phrase | Interface - EBSCOhost Research Databases<br>Search Screen - Advanced Search Database - CINAHL with Full Text | 8,667 |
| S8  | (MH "Transplantation")                                   | Expanders - Apply equivalent subjects<br>Search modes - Boolean/Phrase | Interface - EBSCOhost Research Databases<br>Search Screen - Advanced Search Database - CINAHL with Full Text | 2,220 |
| S7  | (MH "Transplant Recipients")                             | Expanders - Apply equivalent subjects<br>Search modes - Boolean/Phrase | Interface - EBSCOhost Research Databases<br>Search Screen - Advanced Search Database - CINAHL with Full Text | 4,364 |
| S6  | (MH "Pancreas Transplantation+")                         | Expanders - Apply equivalent subjects<br>Search modes - Boolean/Phrase | Interface - EBSCOhost Research Databases<br>Search Screen - Advanced Search Database - CINAHL with Full Text | 639   |
| S5  | (MH "Lung Transplantation+")                             | Expanders - Apply equivalent subjects<br>Search modes - Boolean/Phrase | Interface - EBSCOhost Research Databases<br>Search Screen - Advanced Search Database - CINAHL with Full Text | 3,134 |
| S4  | (MH "Liver Transplantation")                             | Expanders - Apply equivalent subjects                                  | Interface - EBSCOhost Research Databases                                                                     | 6,755 |



|    |                                |                                                                        |                                                                                                              |        |
|----|--------------------------------|------------------------------------------------------------------------|--------------------------------------------------------------------------------------------------------------|--------|
|    |                                | Search modes - Boolean/Phrase                                          | Search Screen - Advanced Search Database - CINAHL with Full Text                                             |        |
| S3 | (MH "Kidney Transplantation+") | Expanders - Apply equivalent subjects<br>Search modes - Boolean/Phrase | Interface - EBSCOhost Research Databases<br>Search Screen - Advanced Search Database - CINAHL with Full Text | 11,488 |
| S2 | (MH "Heart Transplantation+")  | Expanders - Apply equivalent subjects<br>Search modes - Boolean/Phrase | Interface - EBSCOhost Research Databases<br>Search Screen - Advanced Search Database - CINAHL with Full Text | 5,008  |
| S1 | (MH "Organ Transplantation")   | Expanders - Apply equivalent subjects<br>Search modes - Boolean/Phrase | Interface - EBSCOhost Research Databases<br>Search Screen - Advanced Search Database - CINAHL with Full Text | 3,876  |

### **Grey Literature Search Strategy**

#### **Website Search**

Websites of the following authorities and organizations were searched between November 16-19, 2020 for content related to the research question. When searching the websites using the search bar function, the following search terms were used: (ethnic OR ethnicity OR race OR racial OR culture) AND (indigenous OR aboriginal OR first nations OR minority OR Asian OR Black OR African) AND (kidney transplant OR organ donation).

| <b>Organization</b>                                                             | <b>Relevant Results Found</b> |
|---------------------------------------------------------------------------------|-------------------------------|
| Canadian Society of Transplantation                                             | 0                             |
| Canadian Society of Nephrology                                                  | 0                             |
| Canadian Blood Services                                                         | 3                             |
| Canadian Institute for Health Information – Canadian Organ Replacement Register | 2                             |
| Canadian Donation and Transplantation Research Program                          | 0                             |
| The Organ Project                                                               | 0                             |
| Canadian Kidney Knowledge Translation and Generation Network                    | 0                             |
| Can-SOLVE CKD Network                                                           | 3                             |
| BC Transplant                                                                   | 0                             |
| BC Renal Agency                                                                 | 3                             |
| Alberta Health Services                                                         | 0                             |
| Alberta Kidney Care                                                             | 0                             |
| Alberta Kidney Disease Network                                                  | 0                             |
| The Saskatchewan Transplant Program                                             | 0                             |
| Transplant Manitoba                                                             | 0                             |
| Trillium Gift of Life Network                                                   | 1                             |
| London Health Sciences Multi-Organ Transplant Program                           | 0                             |
| St. Joseph's Healthcare Hamilton Kidney & Urinary Services                      | 0                             |
| SickKids Transplant and Regenerative Medicine Centre                            | 0                             |
| St. Michael's Hospital Kidney Transplant Program                                | 0                             |

|                                                              |   |
|--------------------------------------------------------------|---|
| Ontario Renal Network                                        | 1 |
| University Health Network Multi-Organ Transplant Program     | 1 |
| Kingston General Hospital Renal Program                      | 0 |
| The Ottawa Hospital Renal Transplant Program                 | 0 |
| Transplant Quebec                                            | 0 |
| CHUM Montreal                                                | 0 |
| Gouvernement de Québec Greffe Rénales                        | 0 |
| CHU Sainte-Justine Renal Transplant                          | 0 |
| Montreal Children's Hospital Department of Nephrology        | 0 |
| McGill University Health Centre – La Division de Néphrologie | 0 |
| New Brunswick Organ and Tissue Donation Program              | 0 |
| MOTP Atlantic                                                | 0 |
| IWK Health Centre Nephrology                                 | 0 |
| Nova Scotia Health Authority Renal Program                   | 0 |
| Eastern Health Organ Donation                                | 0 |
| Nova Scotia Health Legacy of Life                            | 0 |
| Prince Edwards Island Organ and Tissue Donation              | 0 |

### Advanced Google Search

Grey literature was additionally located using the Advanced Google Search function between November 19-20, 2020 and searching through the first 10 pages of the results. The searches were limited to resources in Canada.

| Search Terms                                                                                                                     | Relevant Results Found |
|----------------------------------------------------------------------------------------------------------------------------------|------------------------|
| (Kidney transplant) AND (ethnic OR racial OR minority OR Indigenous OR Aboriginal OR First Nations OR Asian OR Black OR African) | 1                      |
| (Organ donation) AND (ethnic OR racial OR minority OR Indigenous OR Aboriginal OR First Nations OR Asian OR Black OR African)    | 1                      |

### New York Academy of Medicine Grey Literature Report Database <1999 to 2016>

| Search Terms        | Relevant Results Found |
|---------------------|------------------------|
| "Kidney transplant" | 0                      |
| "Organ donation"    | 0                      |

### Theses Canada Database <1965 to November 20, 2020>

| Search Terms                                                                                                                     | Relevant Results Found |
|----------------------------------------------------------------------------------------------------------------------------------|------------------------|
| "kidney transplant" AND (ethnic OR racial OR minority OR Indigenous OR Aboriginal OR First Nations OR Asian OR Black OR African) | 0                      |
| Kidney transplant ethnic                                                                                                         | 0                      |
| Kidney transplant race                                                                                                           | 0                      |
| Kidney transplant disparity                                                                                                      | 0                      |

|                              |   |
|------------------------------|---|
| Kidney transplant Asia       | 0 |
| Kidney transplant Black      | 0 |
| Organ donation ethnic        | 0 |
| Organ donation racial        | 0 |
| Organ donation Asia          | 0 |
| Organ donation Black         | 0 |
| Organ donation African       | 0 |
| Kidney transplant Indigenous | 2 |
| Organ donation Indigenous    | 1 |

**Health Canada Website Database** < n.d. to November 20, 2020>

| Search Terms                                                                    | Relevant Results Found |
|---------------------------------------------------------------------------------|------------------------|
| Kidney AND transplant AND ethnic AND (minority OR Indigenous OR Asian OR Black) | 1                      |
| Organ AND donation AND ethnic AND (minority OR Indigenous OR Asian OR Black)    | 0                      |

**Publications Canada Database** < n.d. to November 20, 2020>

| Search Terms      | Relevant Results Found |
|-------------------|------------------------|
| Kidney transplant | 0                      |
| Organ donation    | 1                      |
